# Supplementary material for: A novel bis-phosphonyl C-glycoside: the first synthesis of C-(1,6-deoxy-β- d -glucopyranosyl)dimethylphosphonate, a stable bisphosphonate to probe the mechanism of β-phosphoglucomutase
Source: Royal Society of Chemistry journal article supplement (doi:10.1039/d4ob01756k), 2024-12-17
Supplement: d4ob01756k1.pdf [file d4ob01756k1.pdf]

## Supporting Information

# A novel bis-phosphonyl C-glycoside: First synthesis of C-(1,6-deoxy- $\beta$ -D-glucopyranosyl)dimethylphosphonate, a stable bisphosphonate to probe the mechanism of $\beta$ -phosphoglucomutase

Ramprasad Ghosh<sup>a</sup> and David L Jakeman<sup>a,b,\*</sup>

Dalhousie University, <sup>a</sup>College of Pharmacy, and <sup>b</sup>Department of Chemistry Halifax, NS, Canada

## Supporting Information

|                                                                                                           |                |
|-----------------------------------------------------------------------------------------------------------|----------------|
| Table of contents                                                                                         | <b>S1</b>      |
| <sup>1</sup> H, <sup>13</sup> C, <sup>31</sup> P{ <sup>1</sup> H} NMR spectra of compound <b>5</b> .....  | <b>S2-S6</b>   |
| <sup>1</sup> H, <sup>13</sup> C, <sup>31</sup> P{ <sup>1</sup> H} NMR spectra of compound <b>6</b> .....  | <b>S6-S8</b>   |
| <sup>1</sup> H, <sup>13</sup> C, <sup>31</sup> P{ <sup>1</sup> H} NMR spectra of compound <b>7</b> .....  | <b>S9-S11</b>  |
| <sup>1</sup> H, <sup>13</sup> C, <sup>31</sup> P{ <sup>1</sup> H} NMR spectra of compound <b>11</b> ..... | <b>S12-S15</b> |
| <sup>1</sup> H, <sup>13</sup> C, <sup>31</sup> P{ <sup>1</sup> H} NMR spectra of compound <b>12</b> ..... | <b>S16-S20</b> |
| <sup>1</sup> H, <sup>13</sup> C, <sup>31</sup> P{ <sup>1</sup> H} NMR spectra of compound <b>16</b> ..... | <b>S21-S25</b> |
| <sup>1</sup> H, <sup>13</sup> C, <sup>31</sup> P{ <sup>1</sup> H} NMR spectra of compound <b>17</b> ..... | <b>S26-S28</b> |
| <sup>1</sup> H, <sup>13</sup> C, <sup>31</sup> P{ <sup>1</sup> H} NMR spectra of compound <b>1</b> .....  | <b>S29-S31</b> |

May29-2013-RAM-15\_NEW

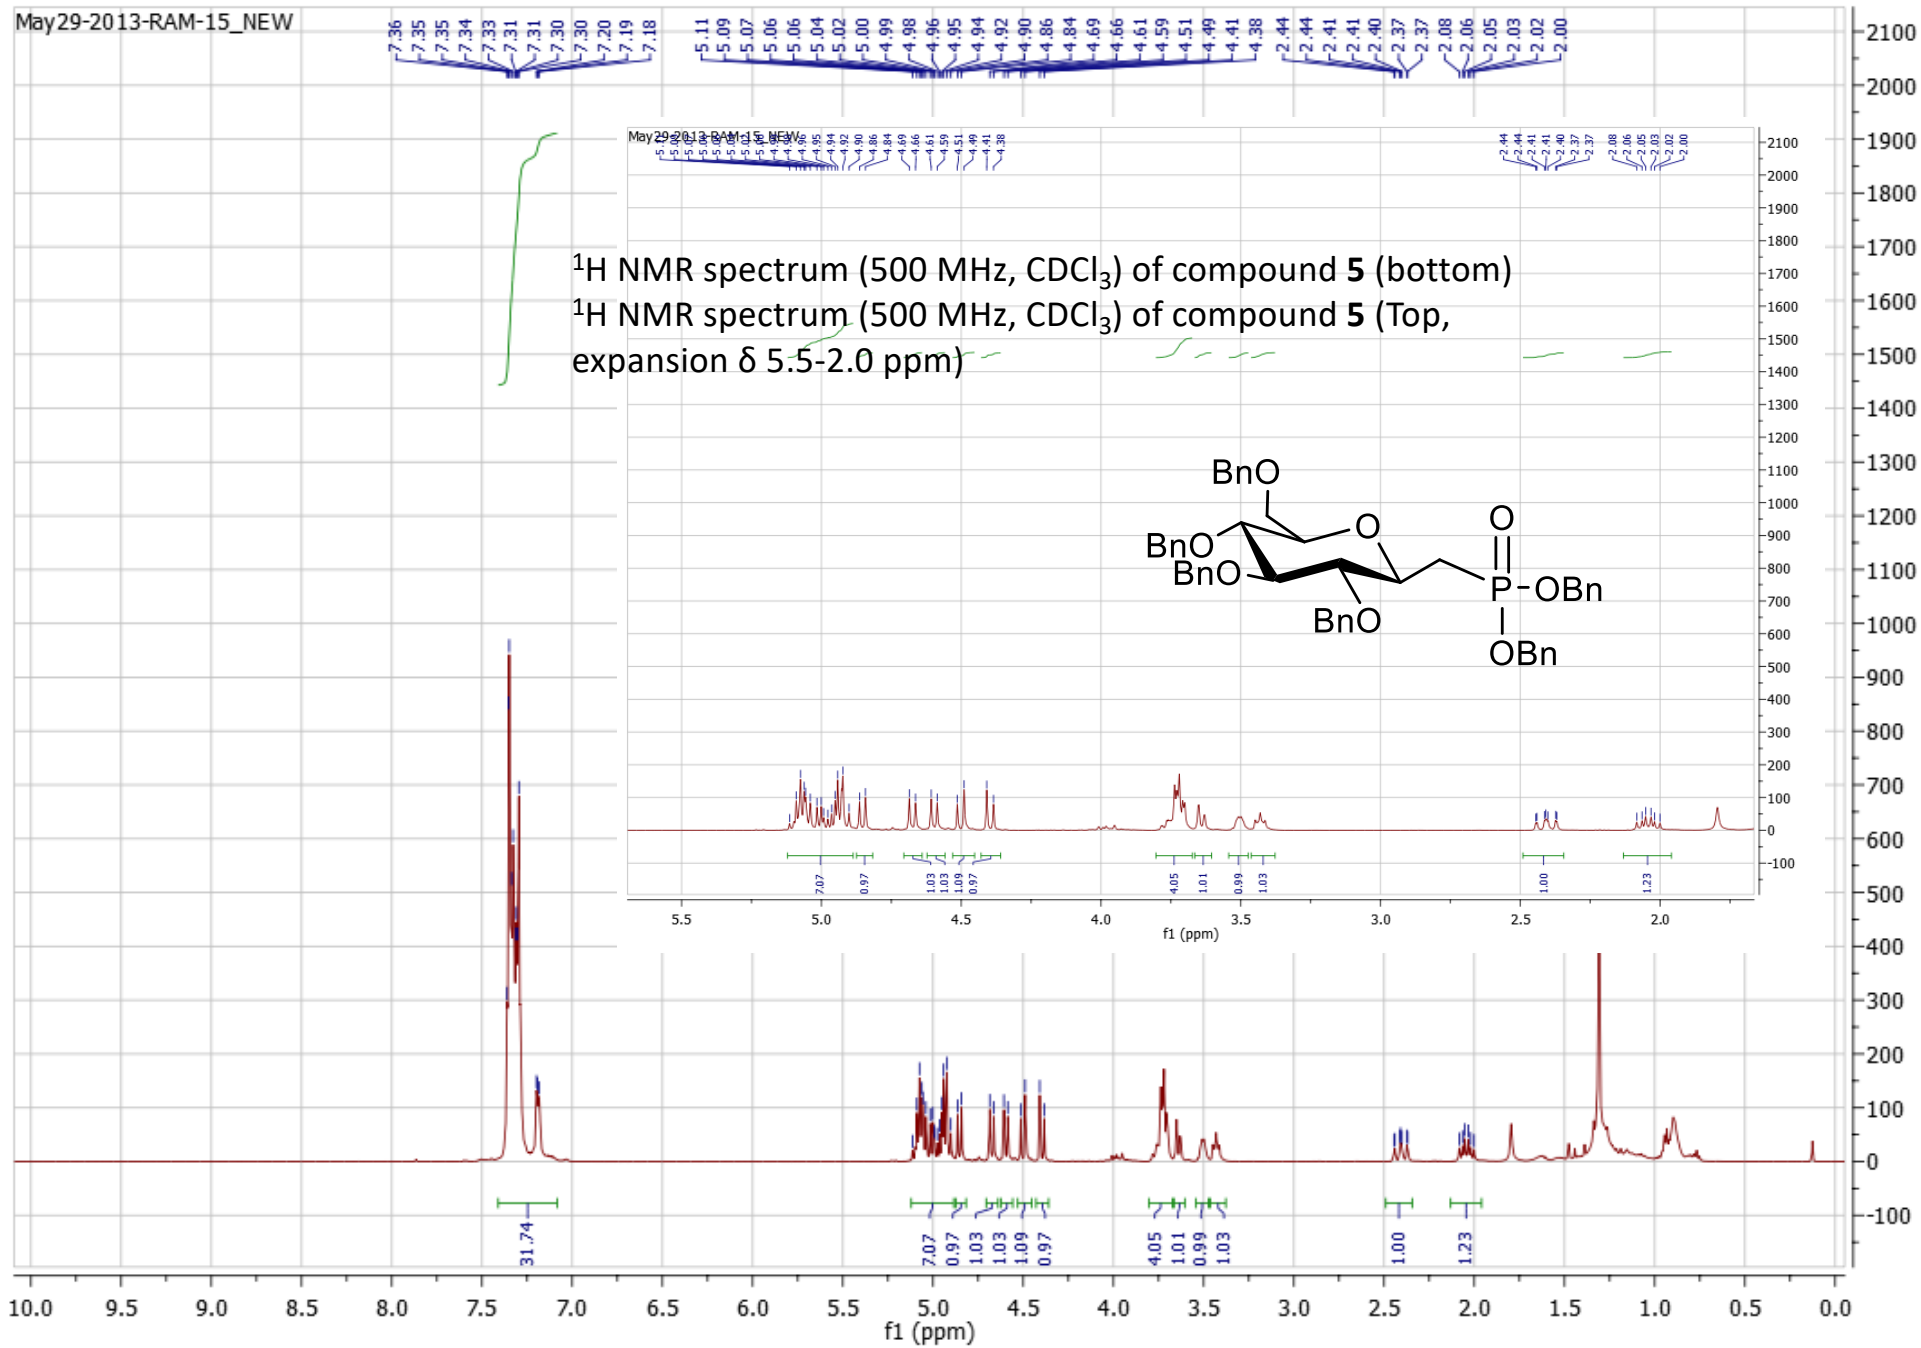

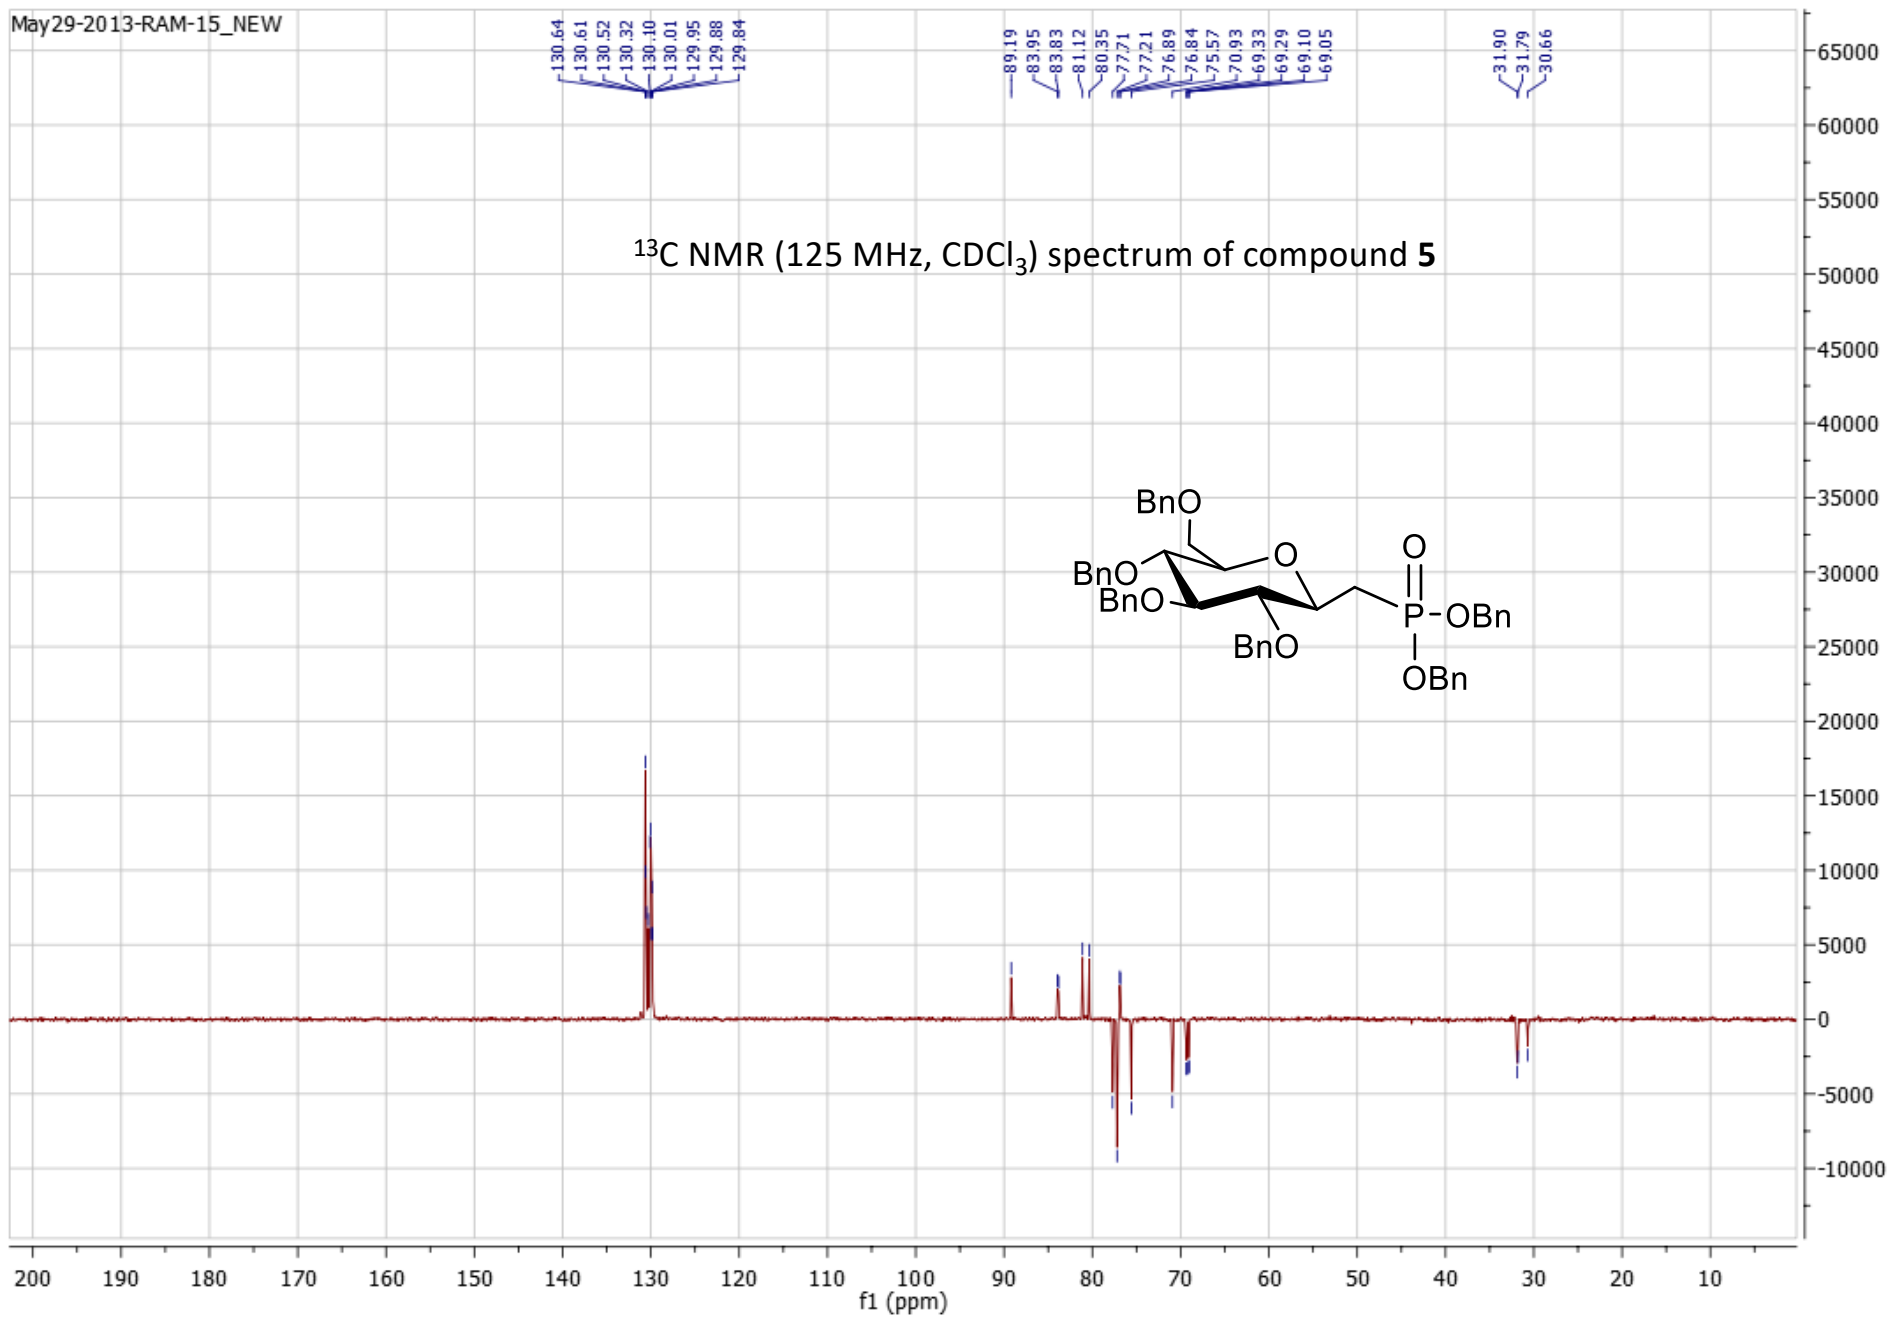



29.82

$^{31}\text{P}\{^1\text{H}\}$  NMR (202.5 MHz,  $\text{CDCl}_3$ ) spectrum of compound **5**

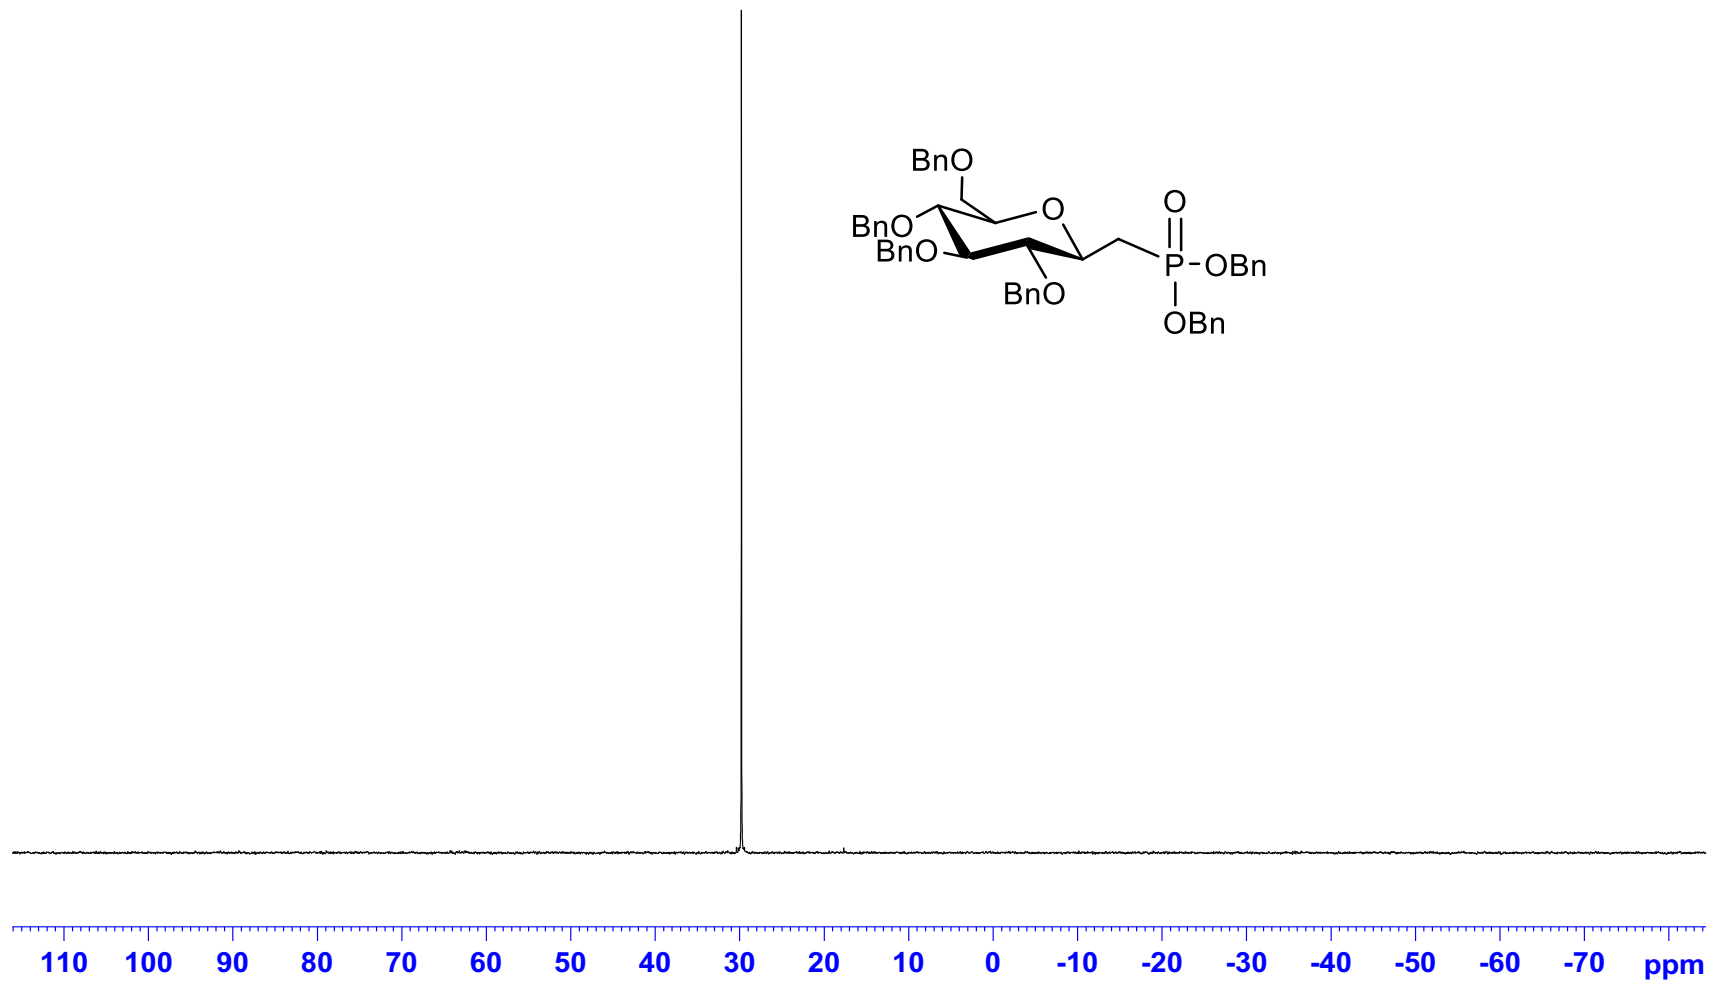

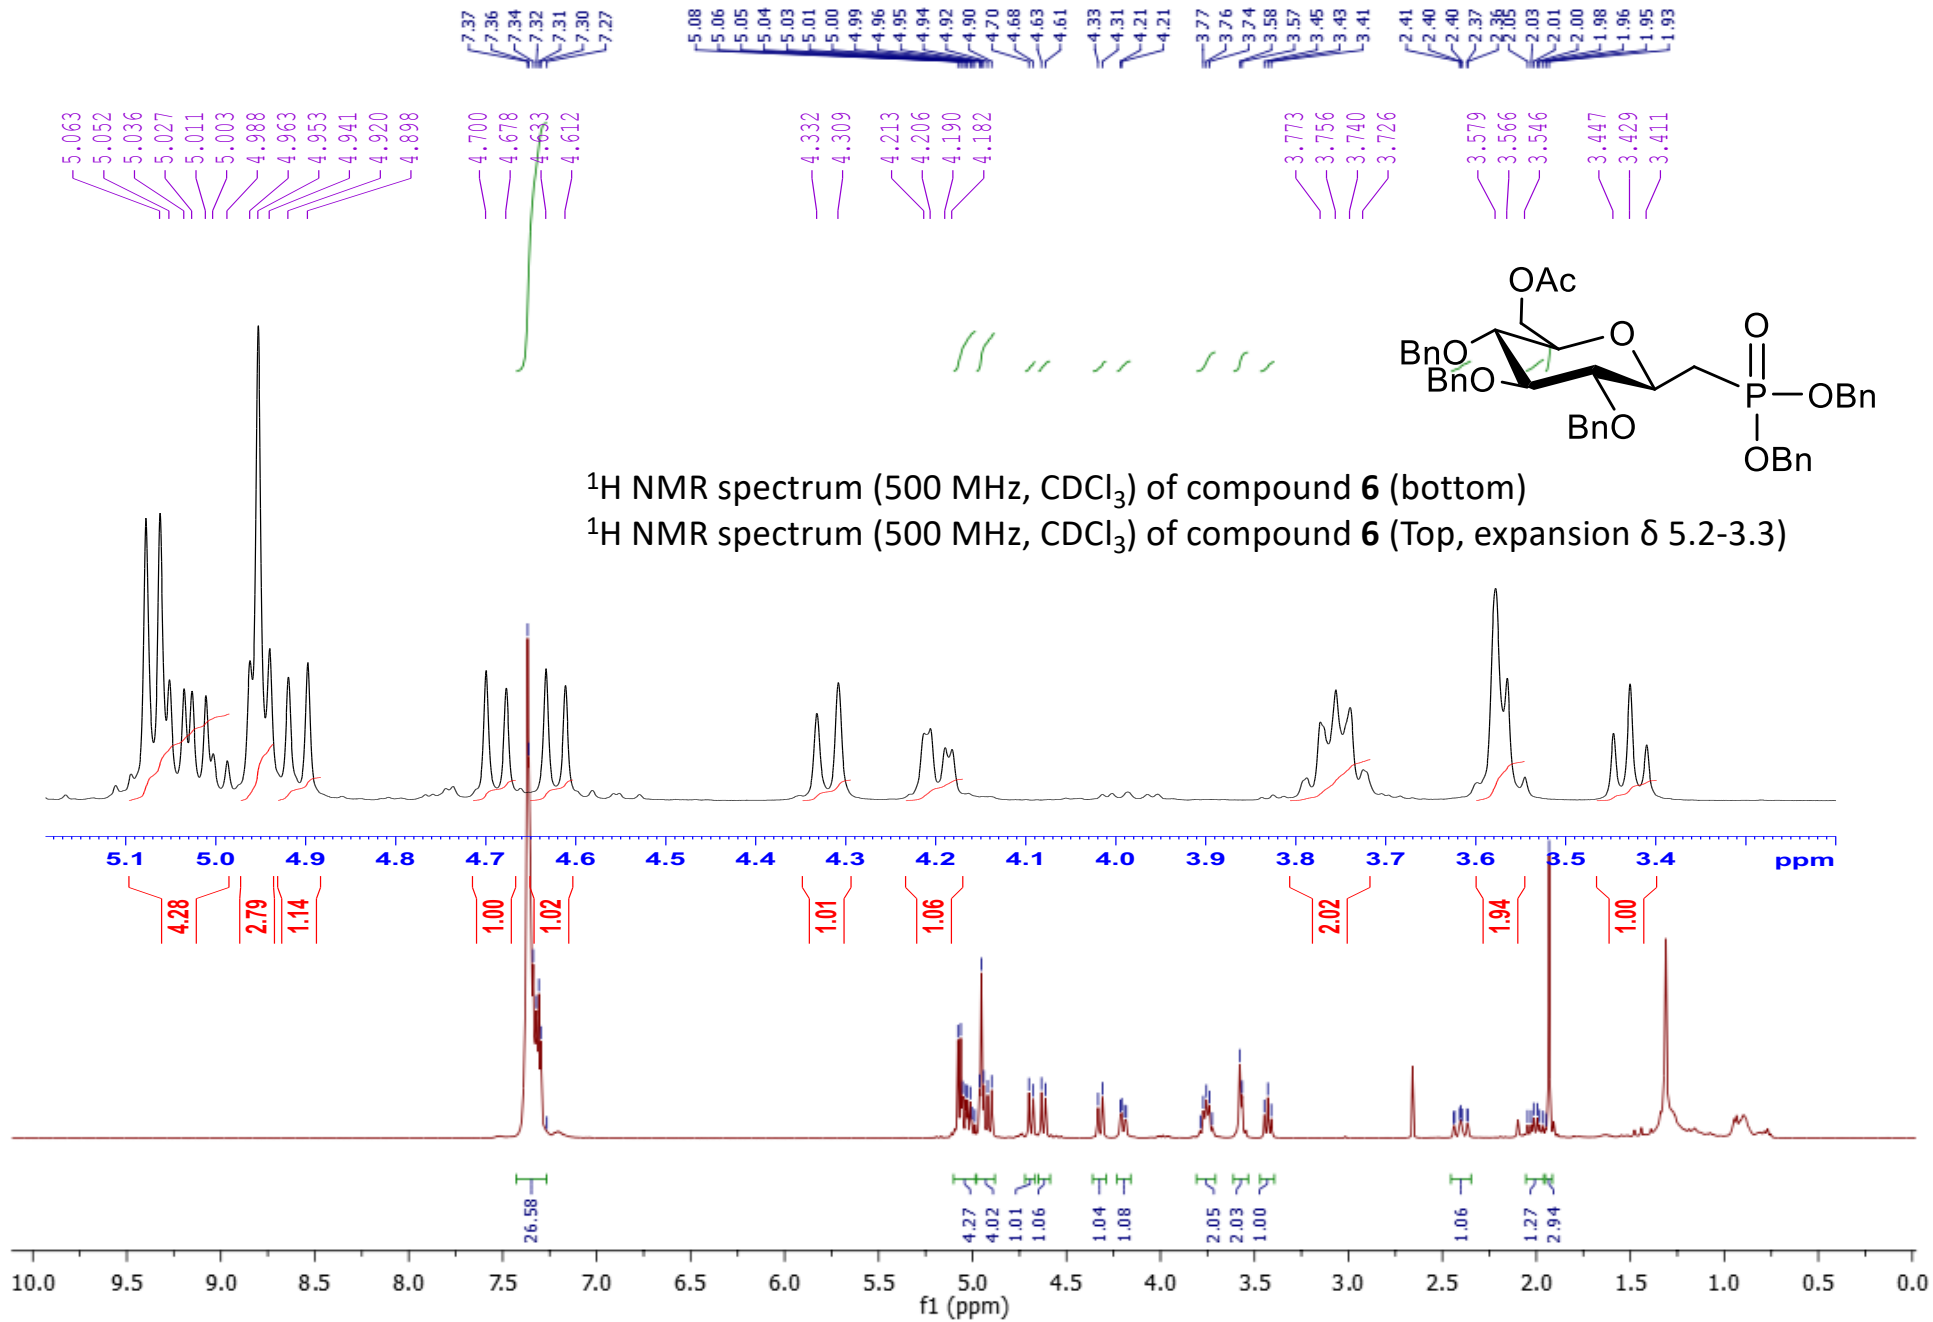

<sup>13</sup>C NMR (125 MHz, CDCl<sub>3</sub>) spectrum of compound **6** (Top, expansion of 90.0-64.5 ppm)

<sup>13</sup>C NMR (125 MHz, CDCl<sub>3</sub>) spectrum of compound **6** (bottom)

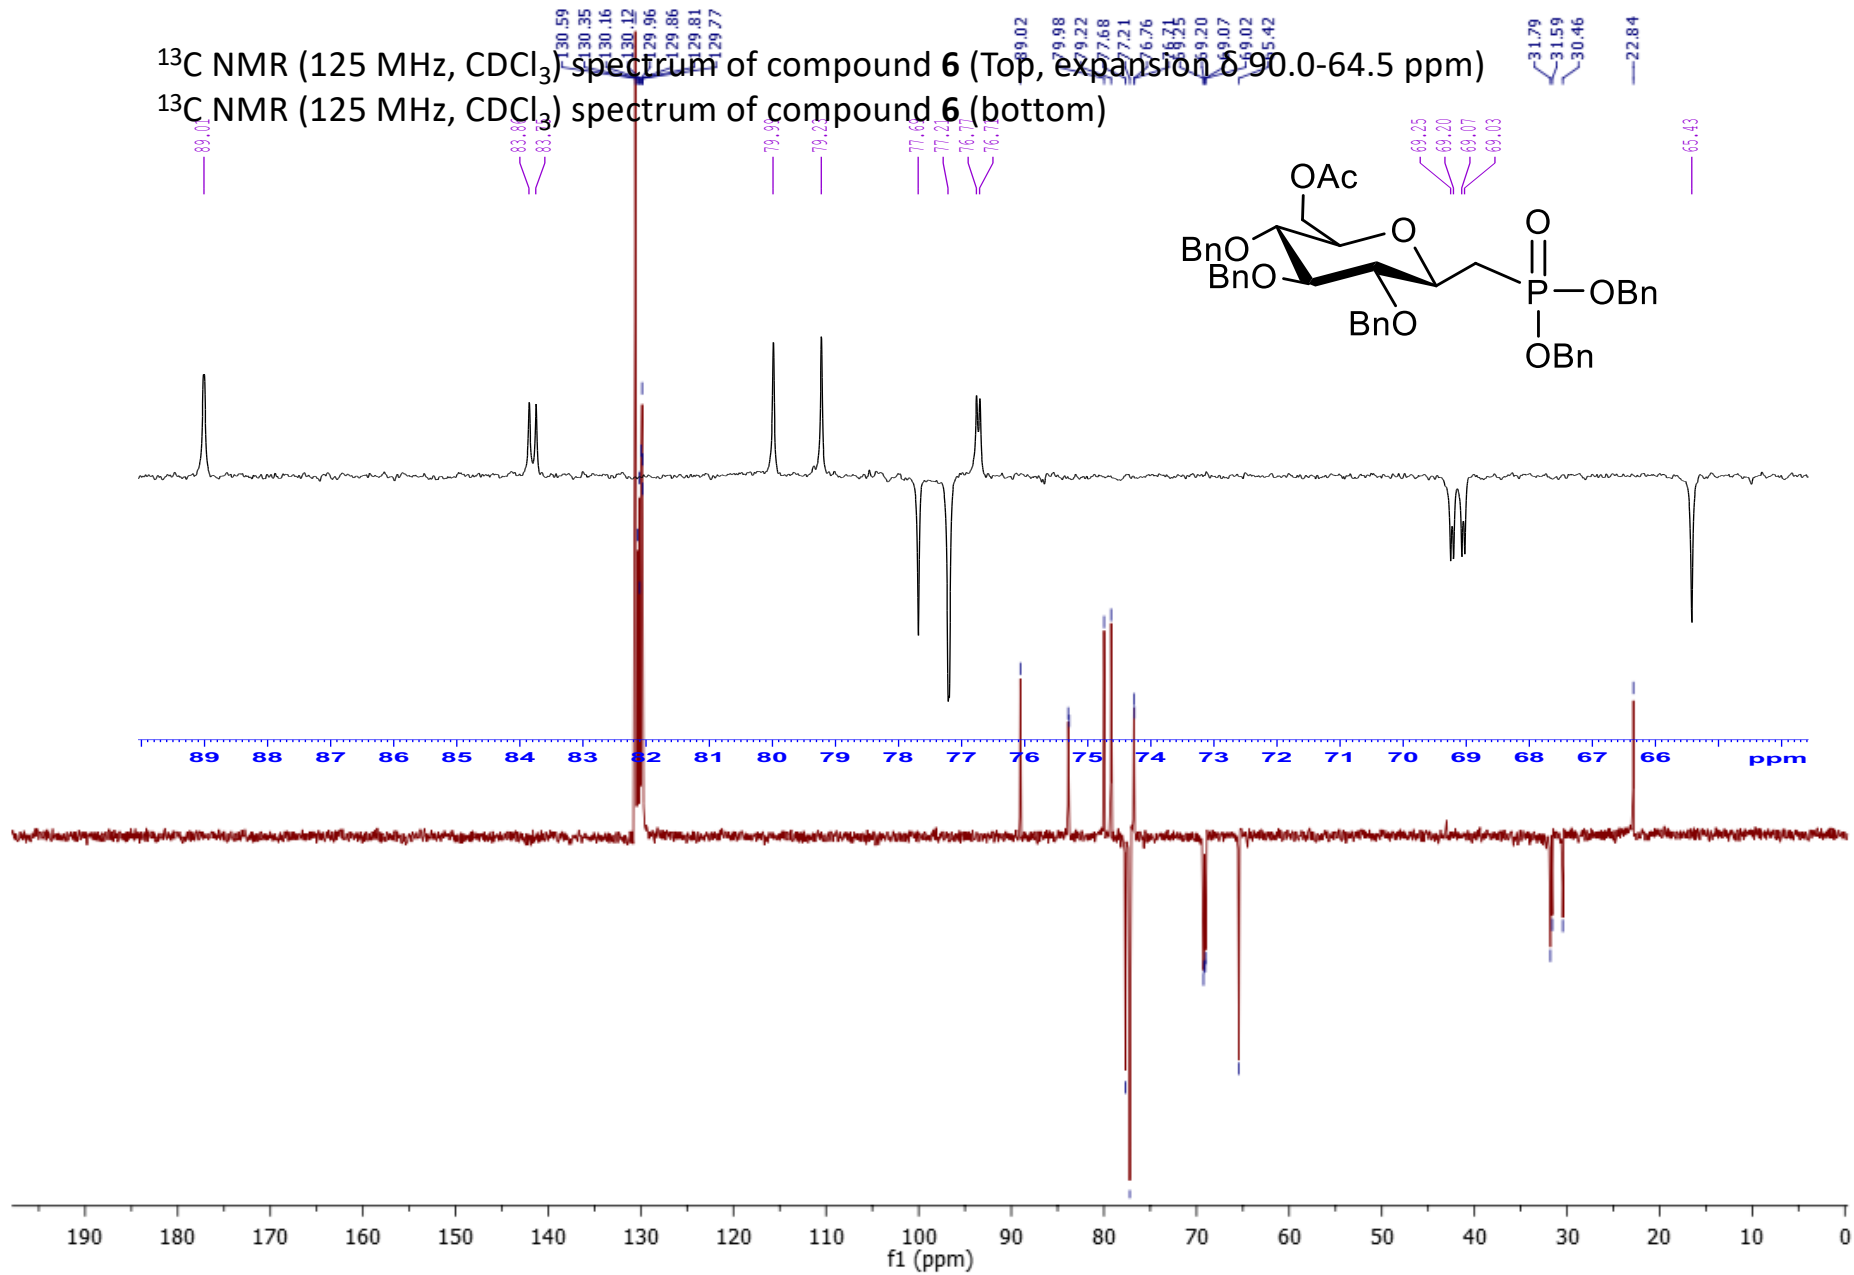

29.47

$^{31}\text{P}\{^1\text{H}\}$  NMR (202.5 MHz,  $\text{CDCl}_3$ ) spectrum of compound **6**

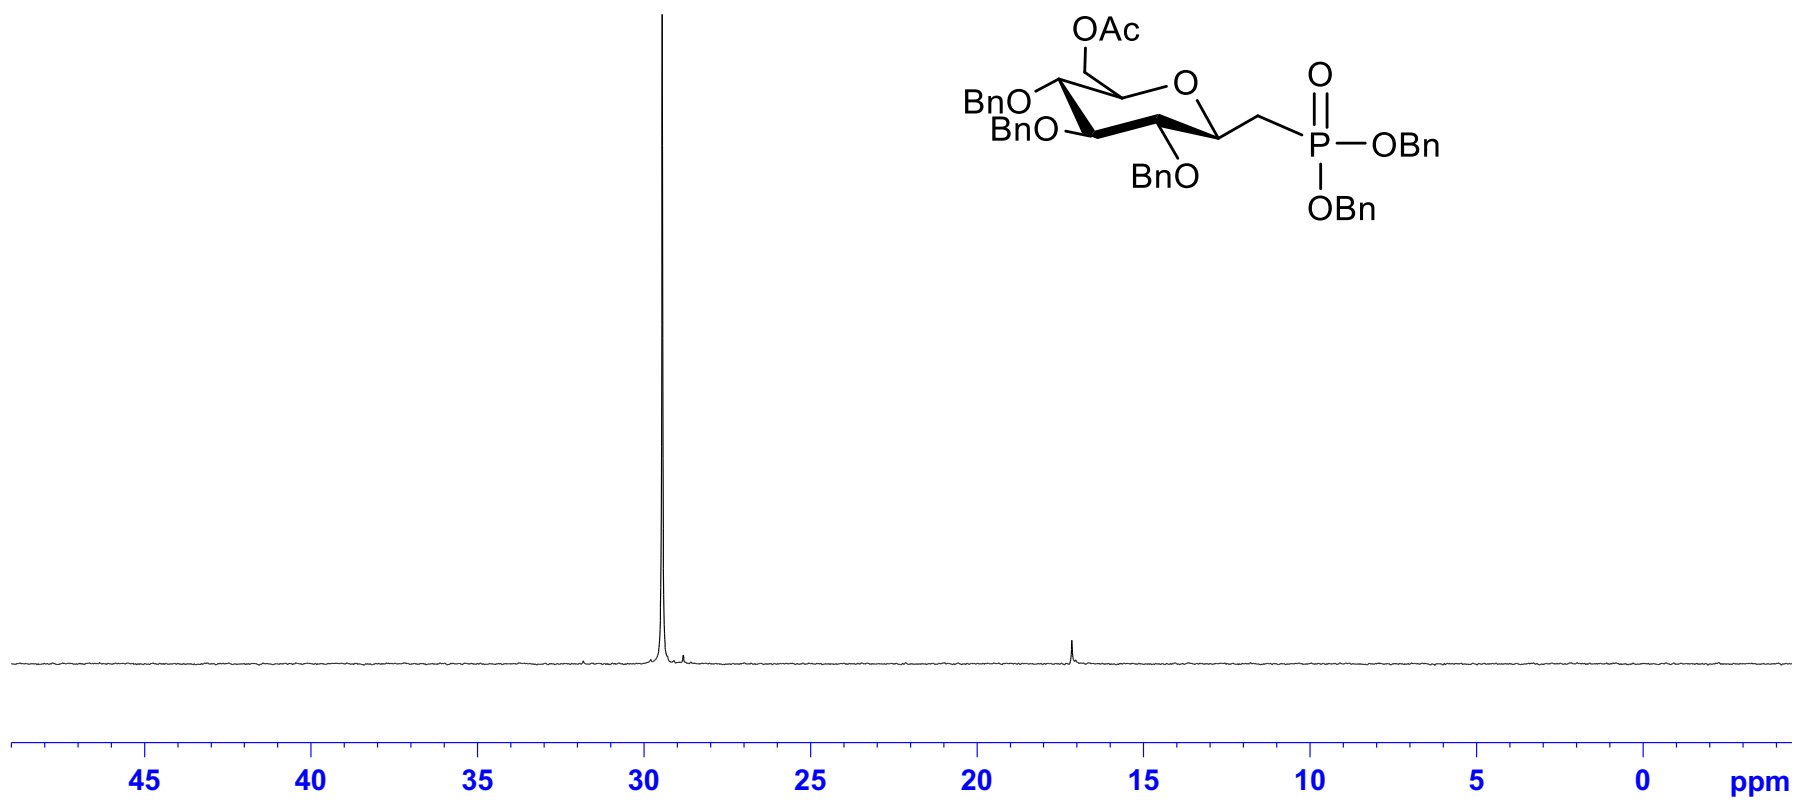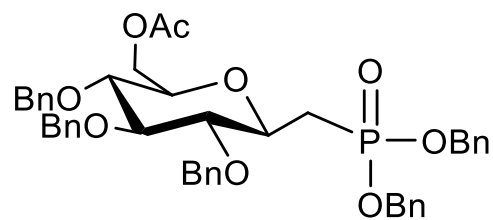

S8



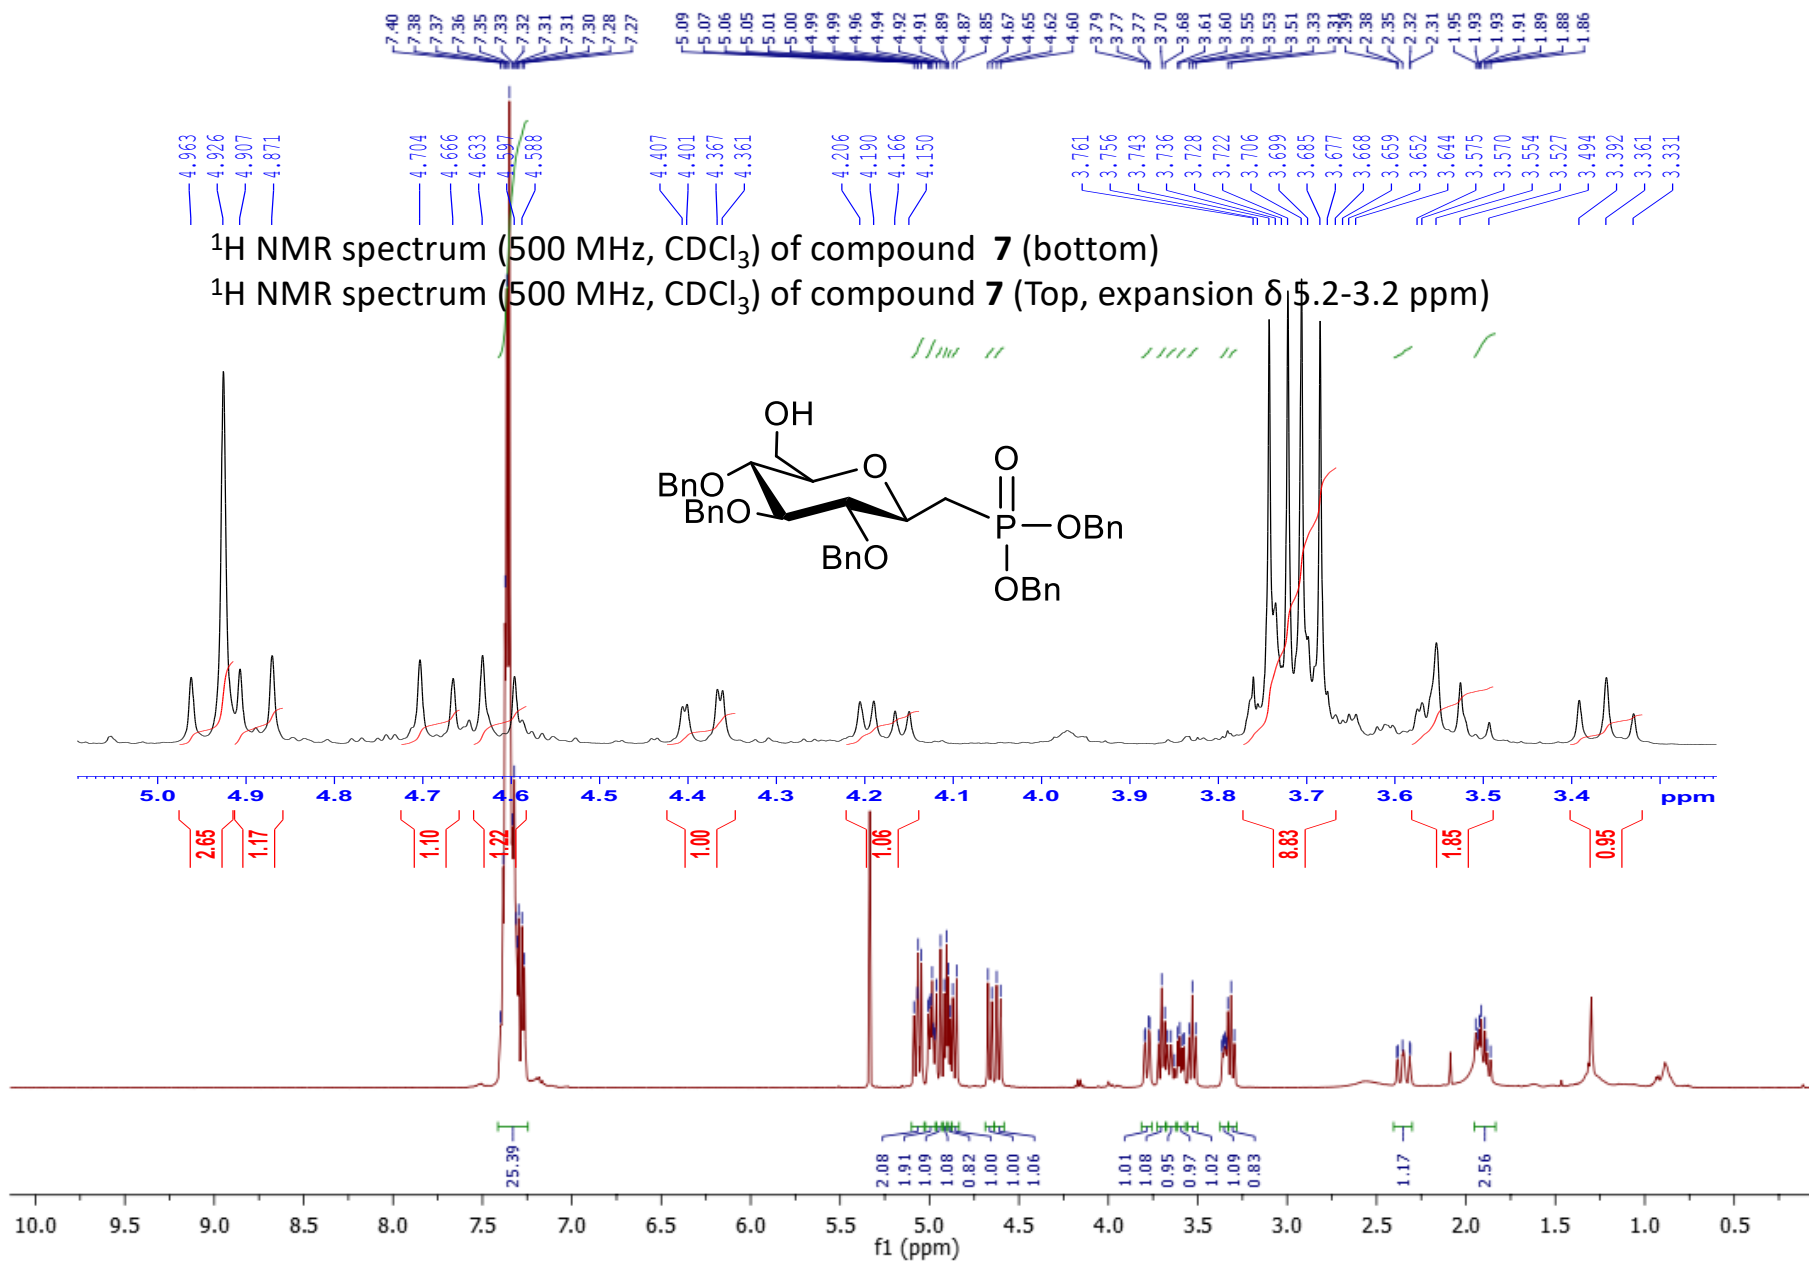

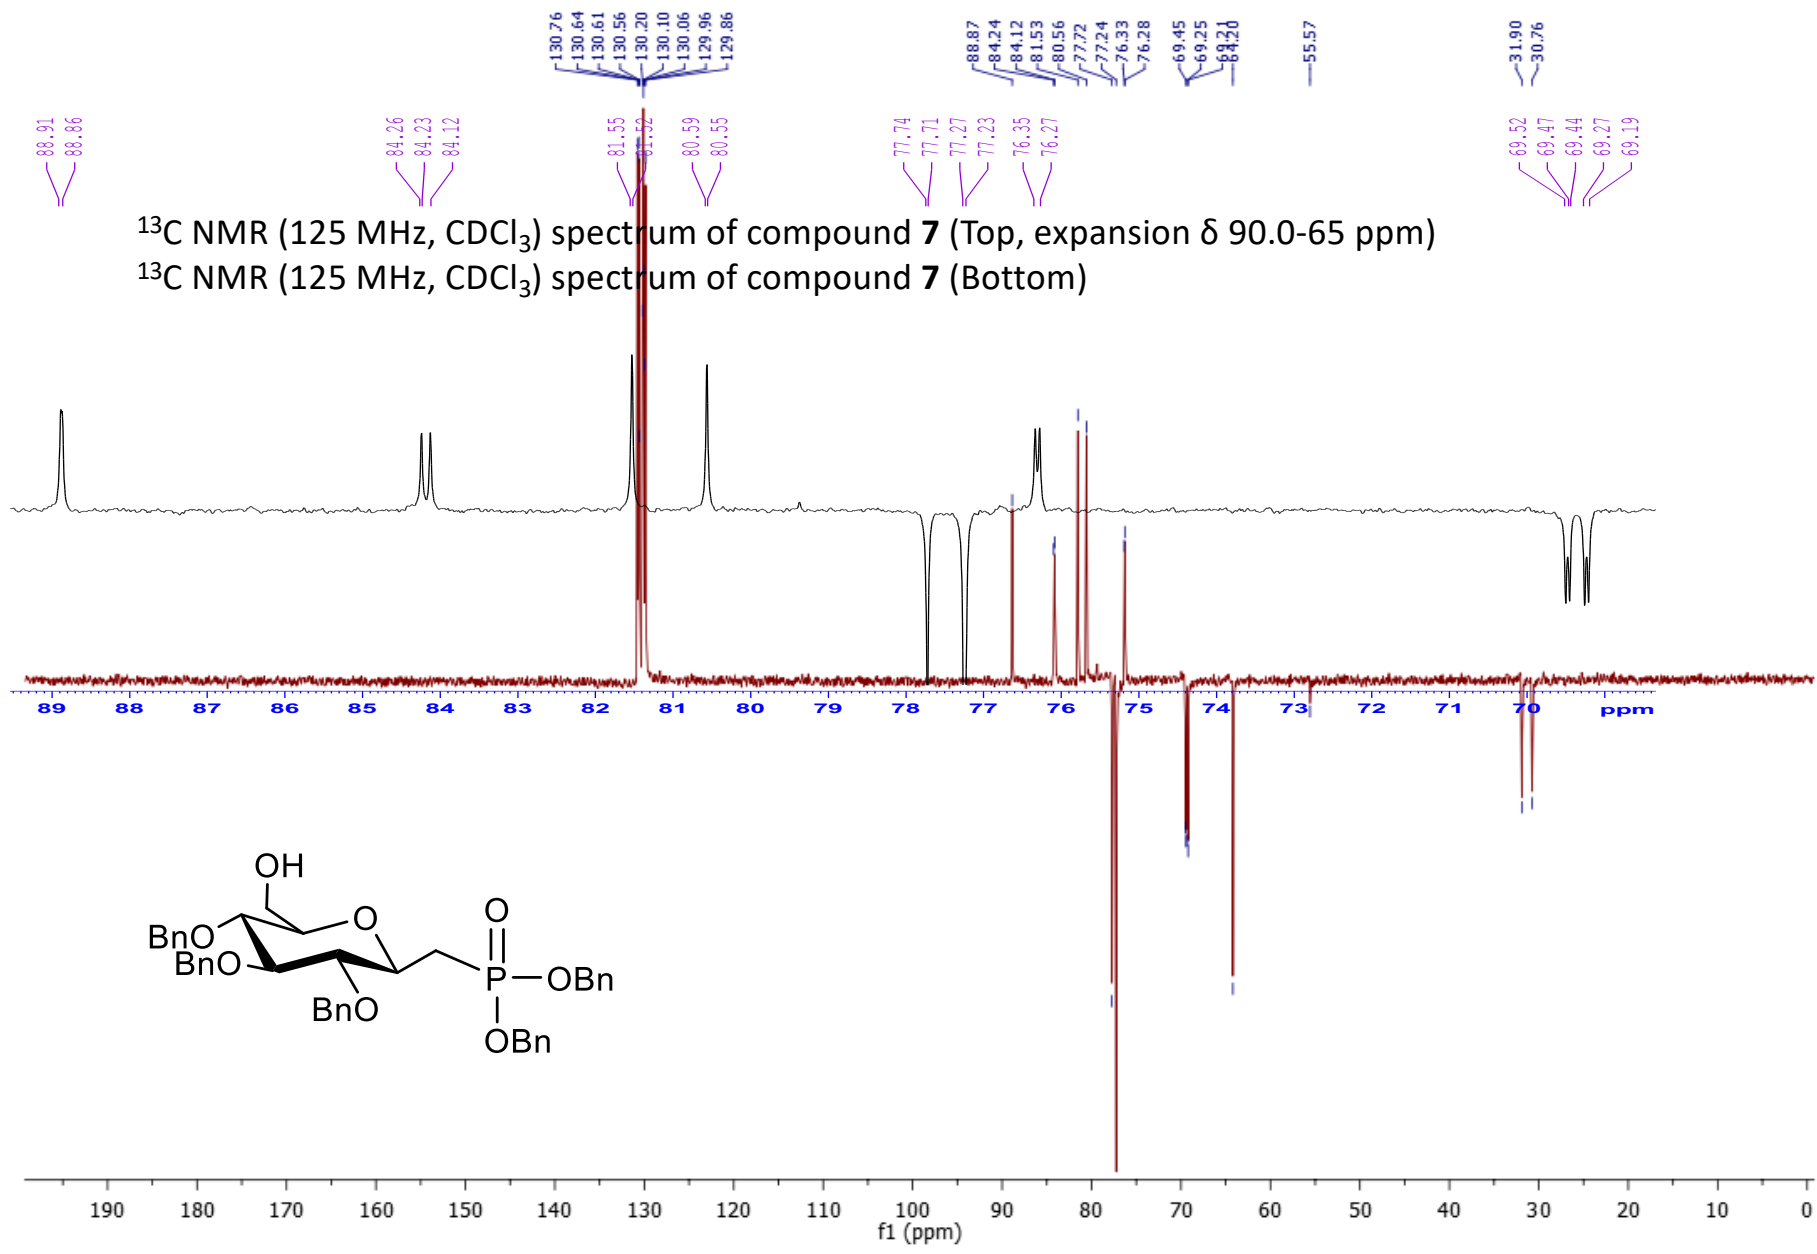

29.71

$^{31}\text{P}\{^1\text{H}\}$  NMR (202.5 MHz,  $\text{CDCl}_3$ ) spectrum of compound **7**

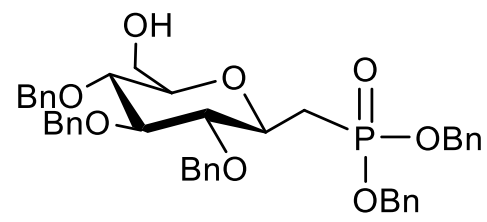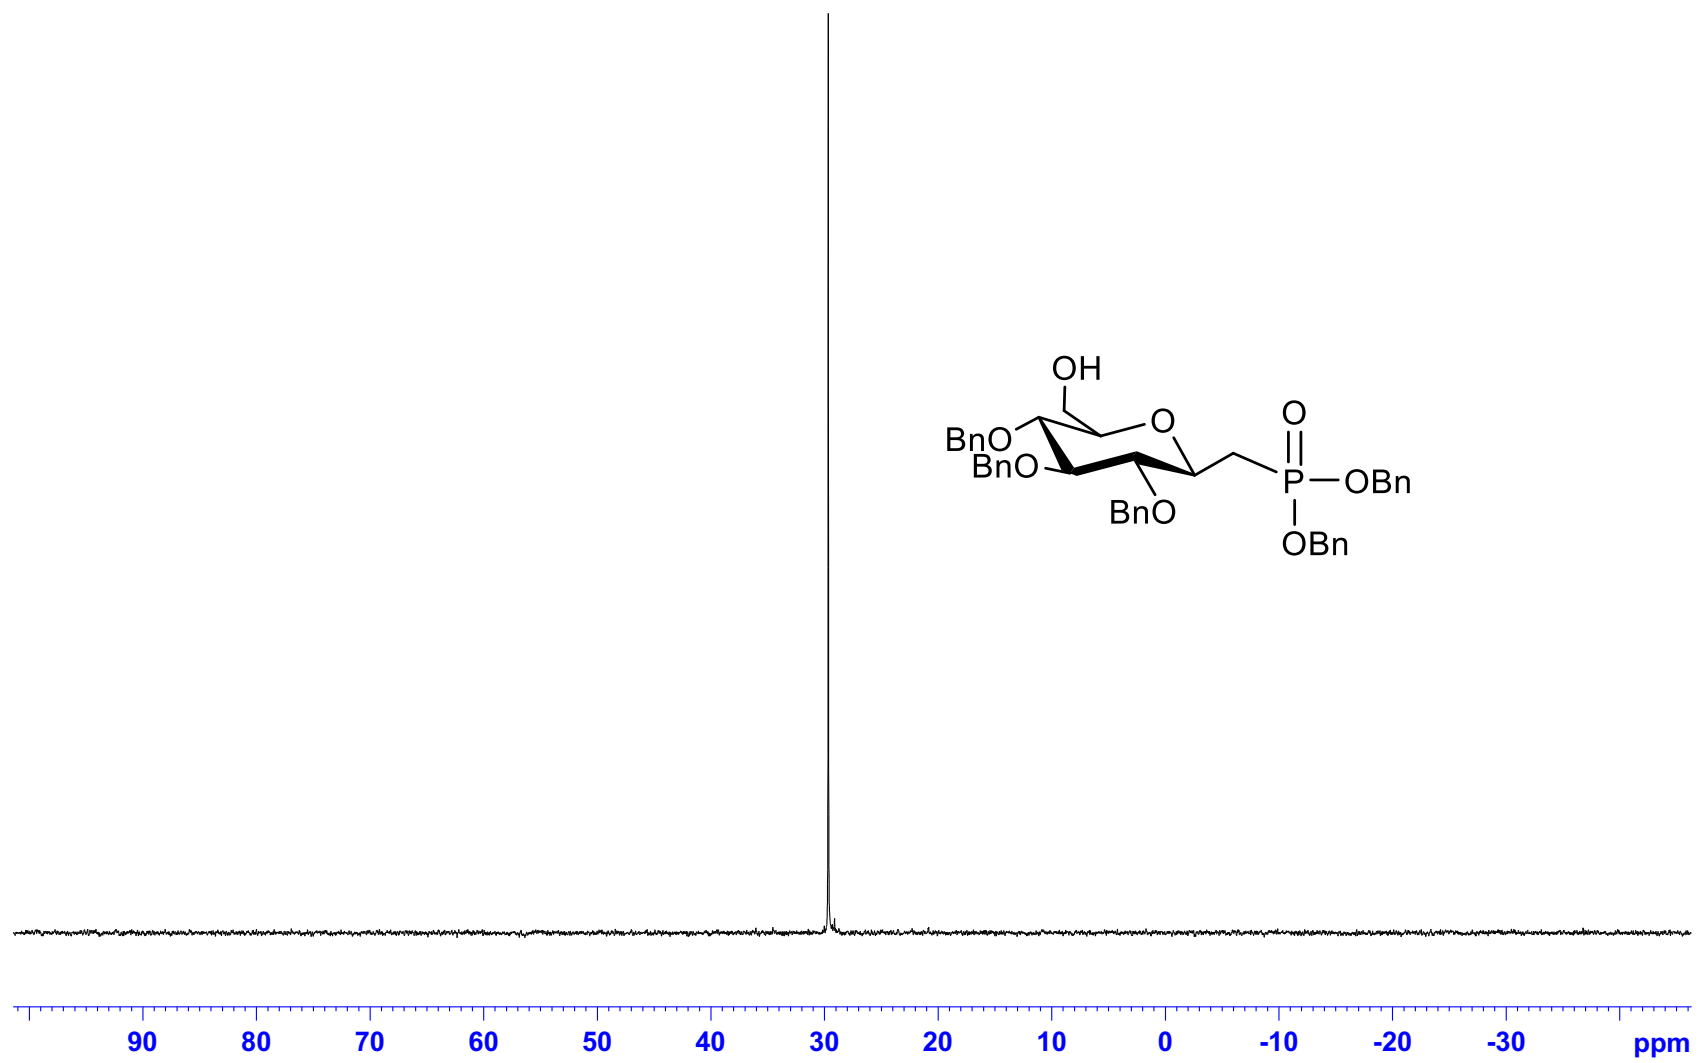



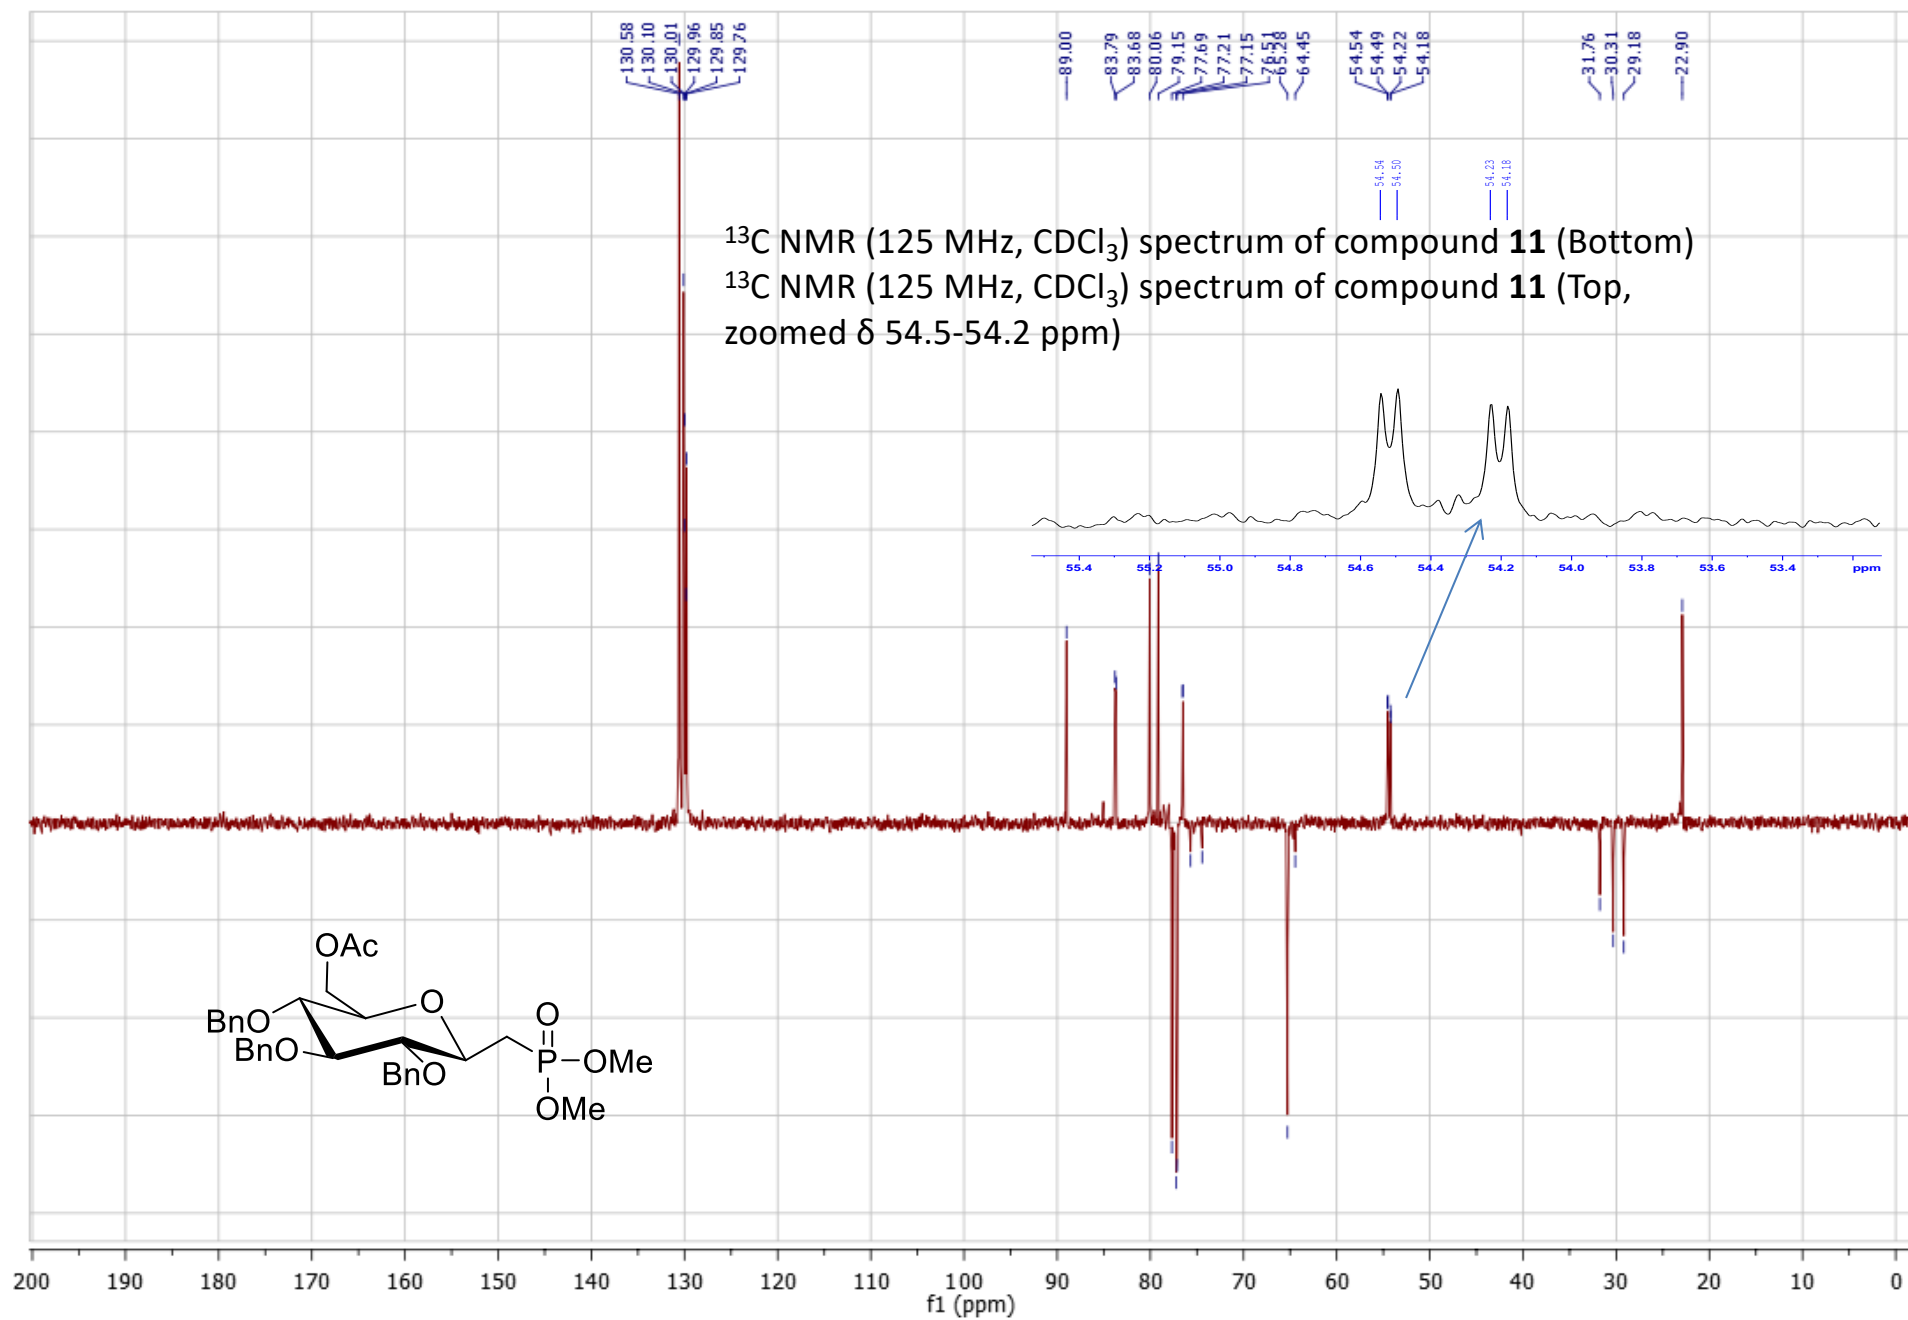

89.01

83.79

83.68

80.07

79.15

77.69

77.22

77.15

76.56

76.51

$^{13}\text{C}$  NMR (125 MHz,  $\text{CDCl}_3$ ) spectrum of compound **11** (expansion  $\delta$  90-76 ppm)

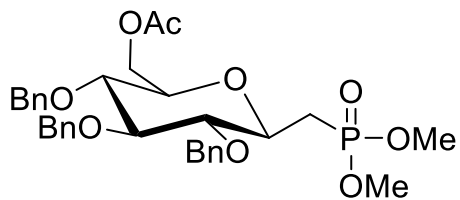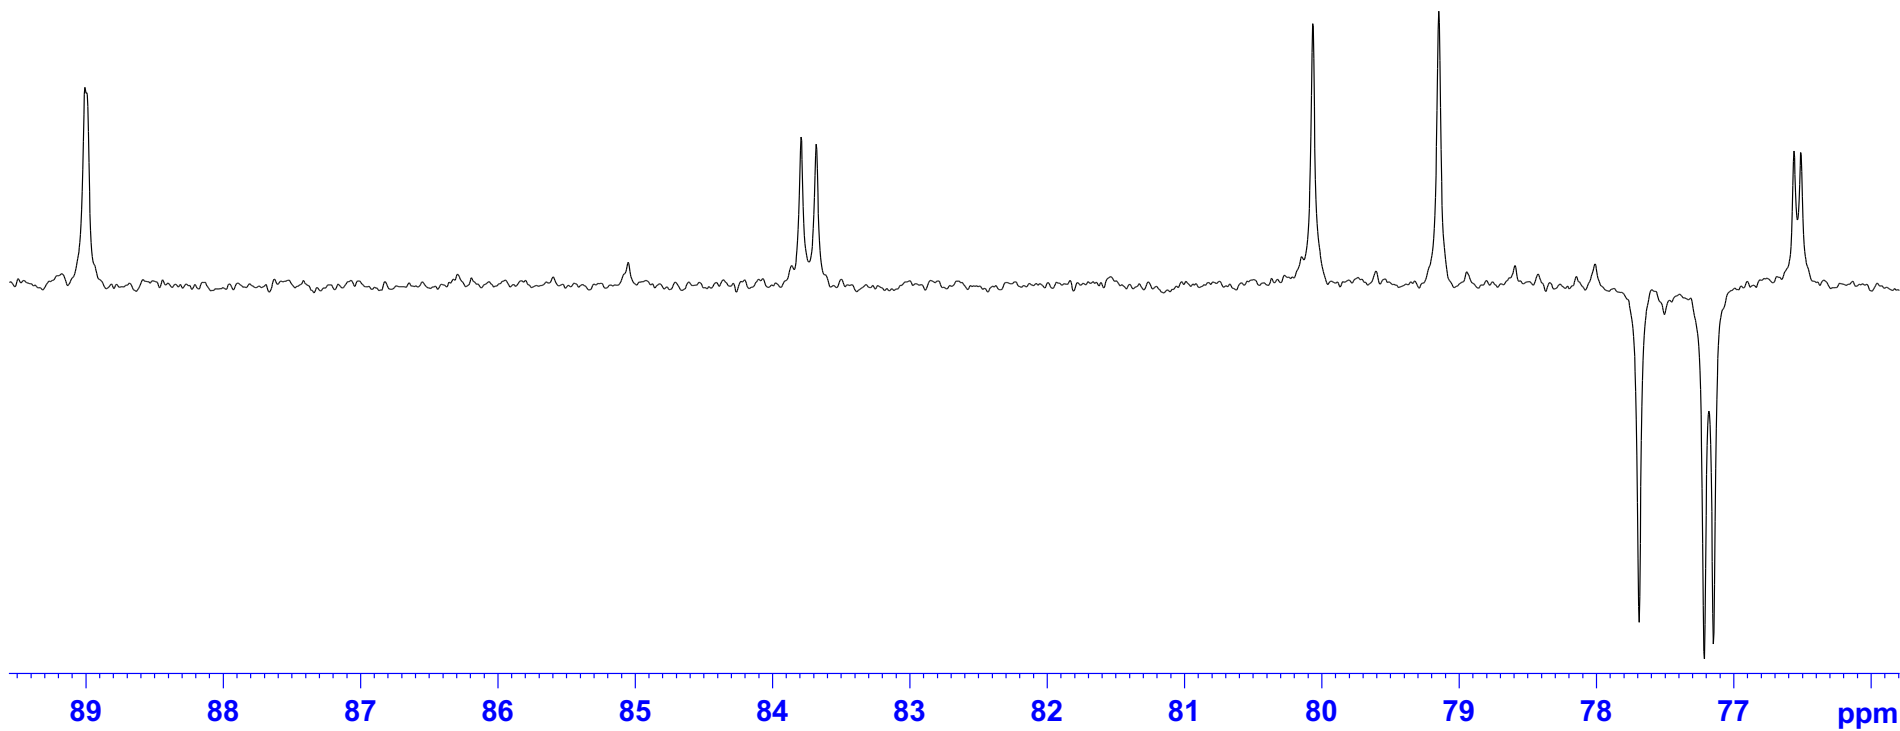

S14

31.14

$^{31}\text{P}\{^1\text{H}\}$  NMR (202.5 MHz,  $\text{CDCl}_3$ ) spectrum of compound **11**

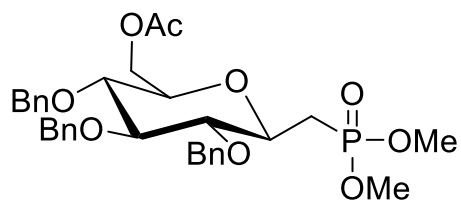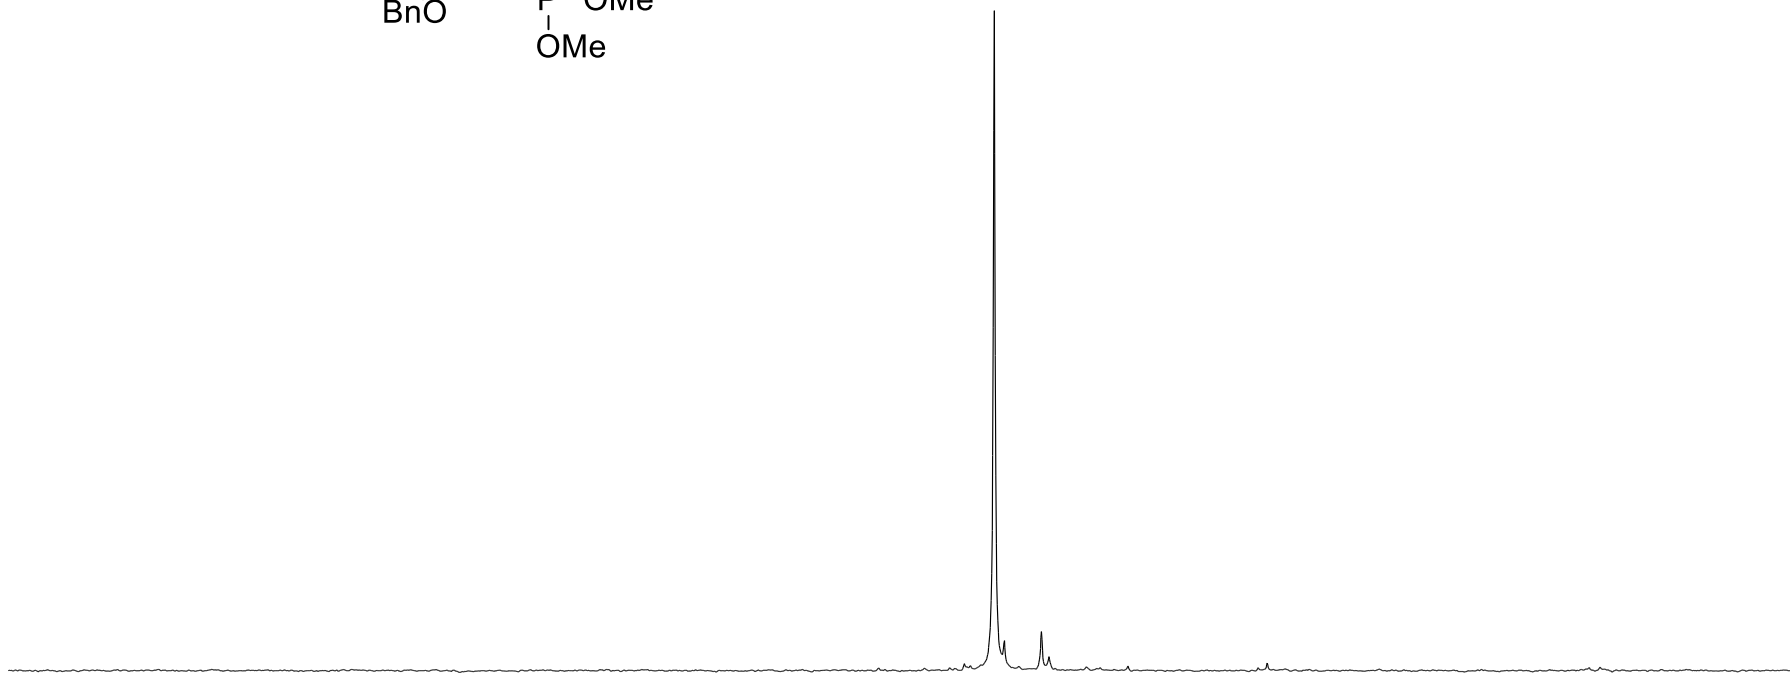

45 44 43 42 41 40 39 38 37 36 35 34 33 32 31 30 29 28 27 26 25 24 23 22 21 ppm

S15

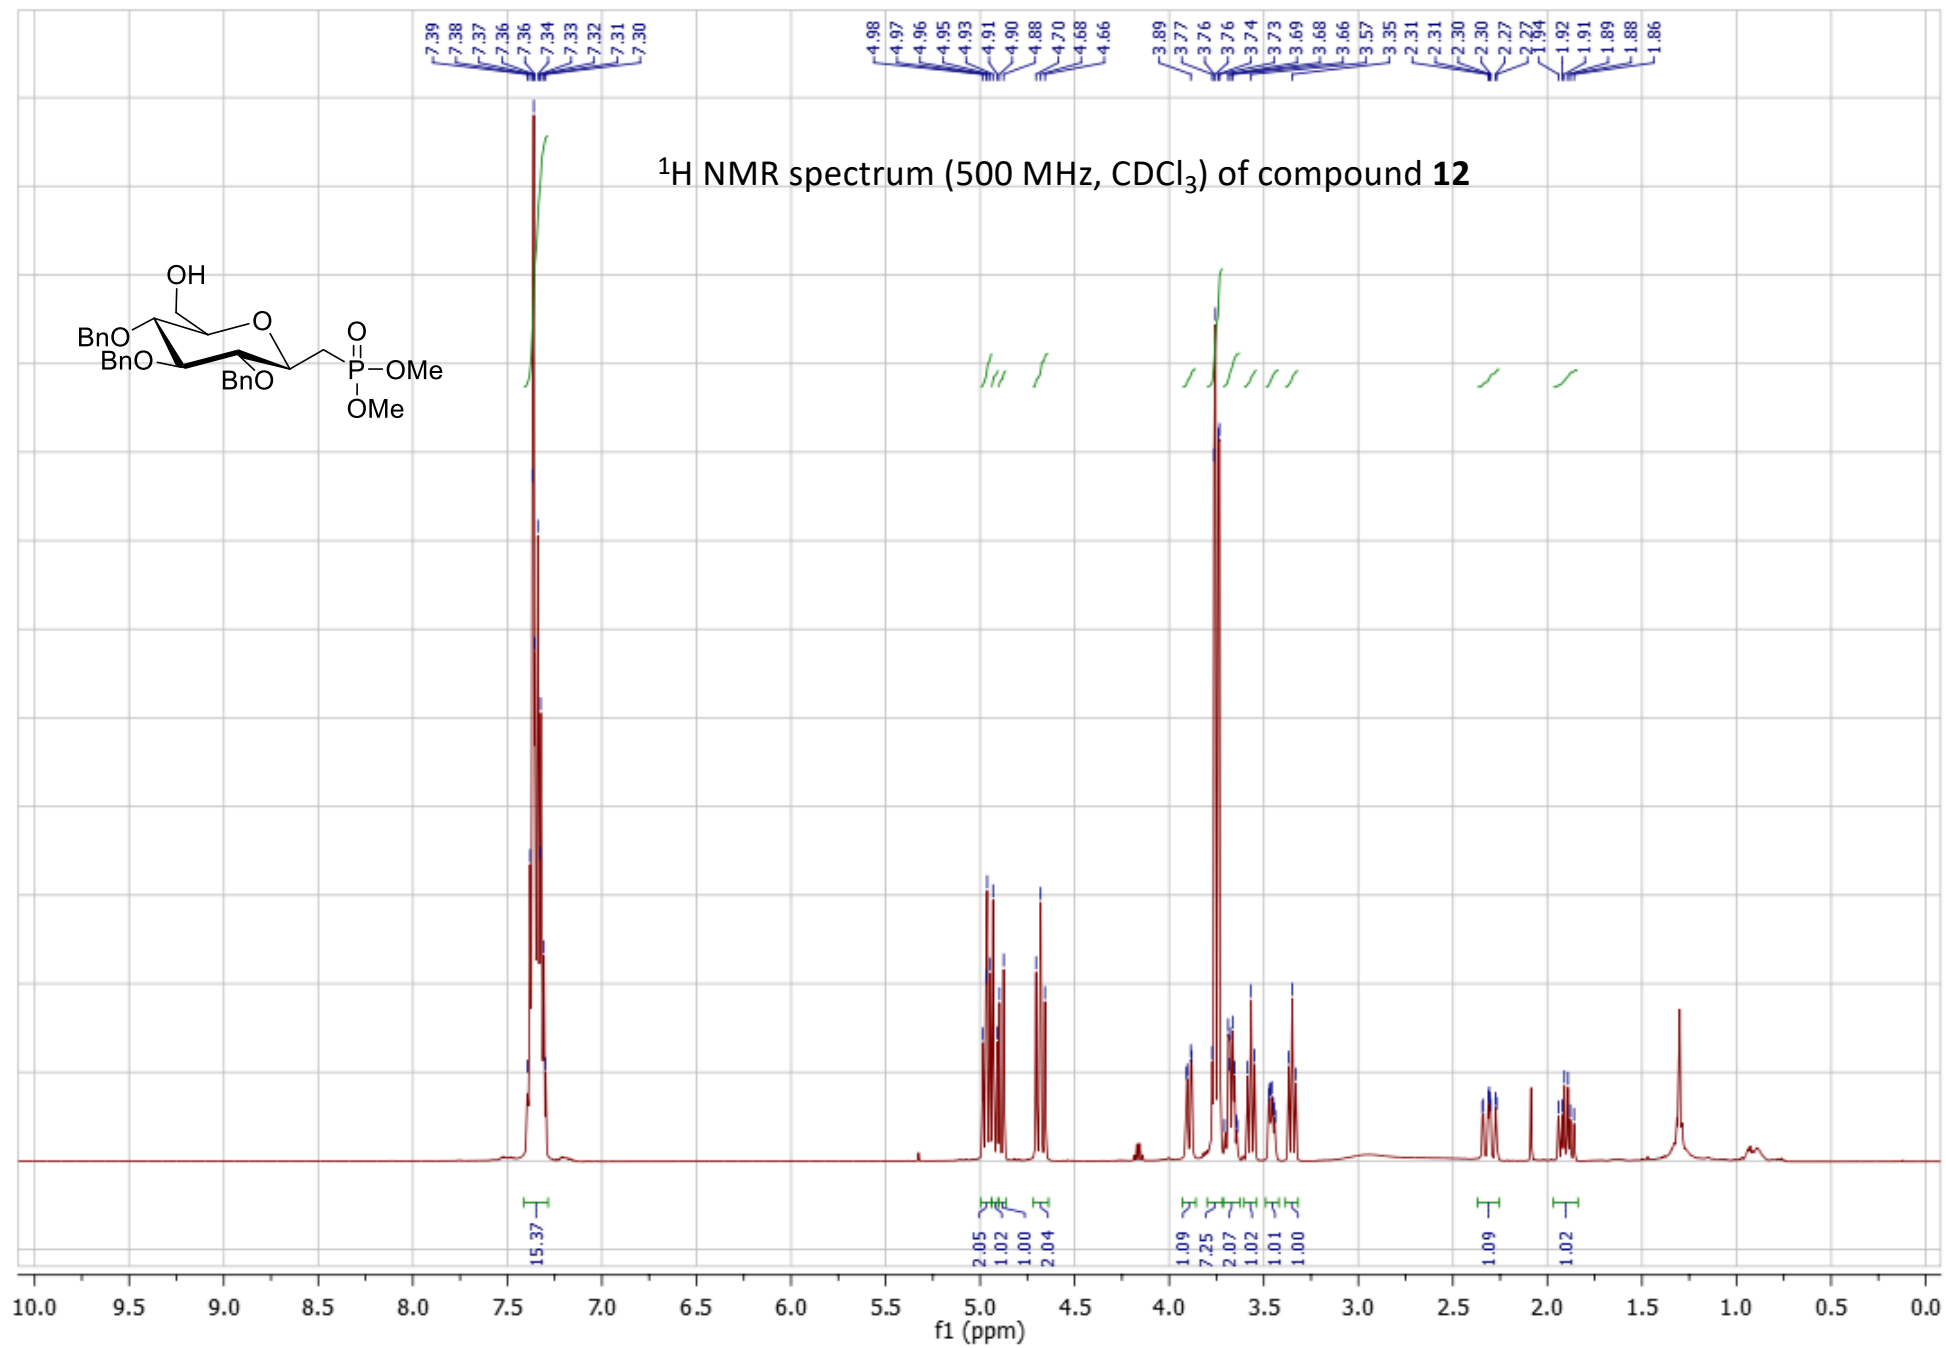



4.985  
4.969  
4.963  
4.947  
4.932  
4.910  
4.898  
4.876

4.704  
4.681  
4.657

3.909  
3.904  
3.886  
3.881  
3.773  
3.763  
3.756  
3.741  
3.734  
3.707  
3.703  
3.688  
3.683  
3.678  
3.665  
3.659  
3.654  
3.644  
3.640  
3.586  
3.567  
3.549  
3.474  
3.470  
3.463  
3.457

$^1\text{H}$  NMR spectrum (500 MHz,  $\text{CDCl}_3$ ) of compound **12** (expansion  $\delta$  5.0-3.3)

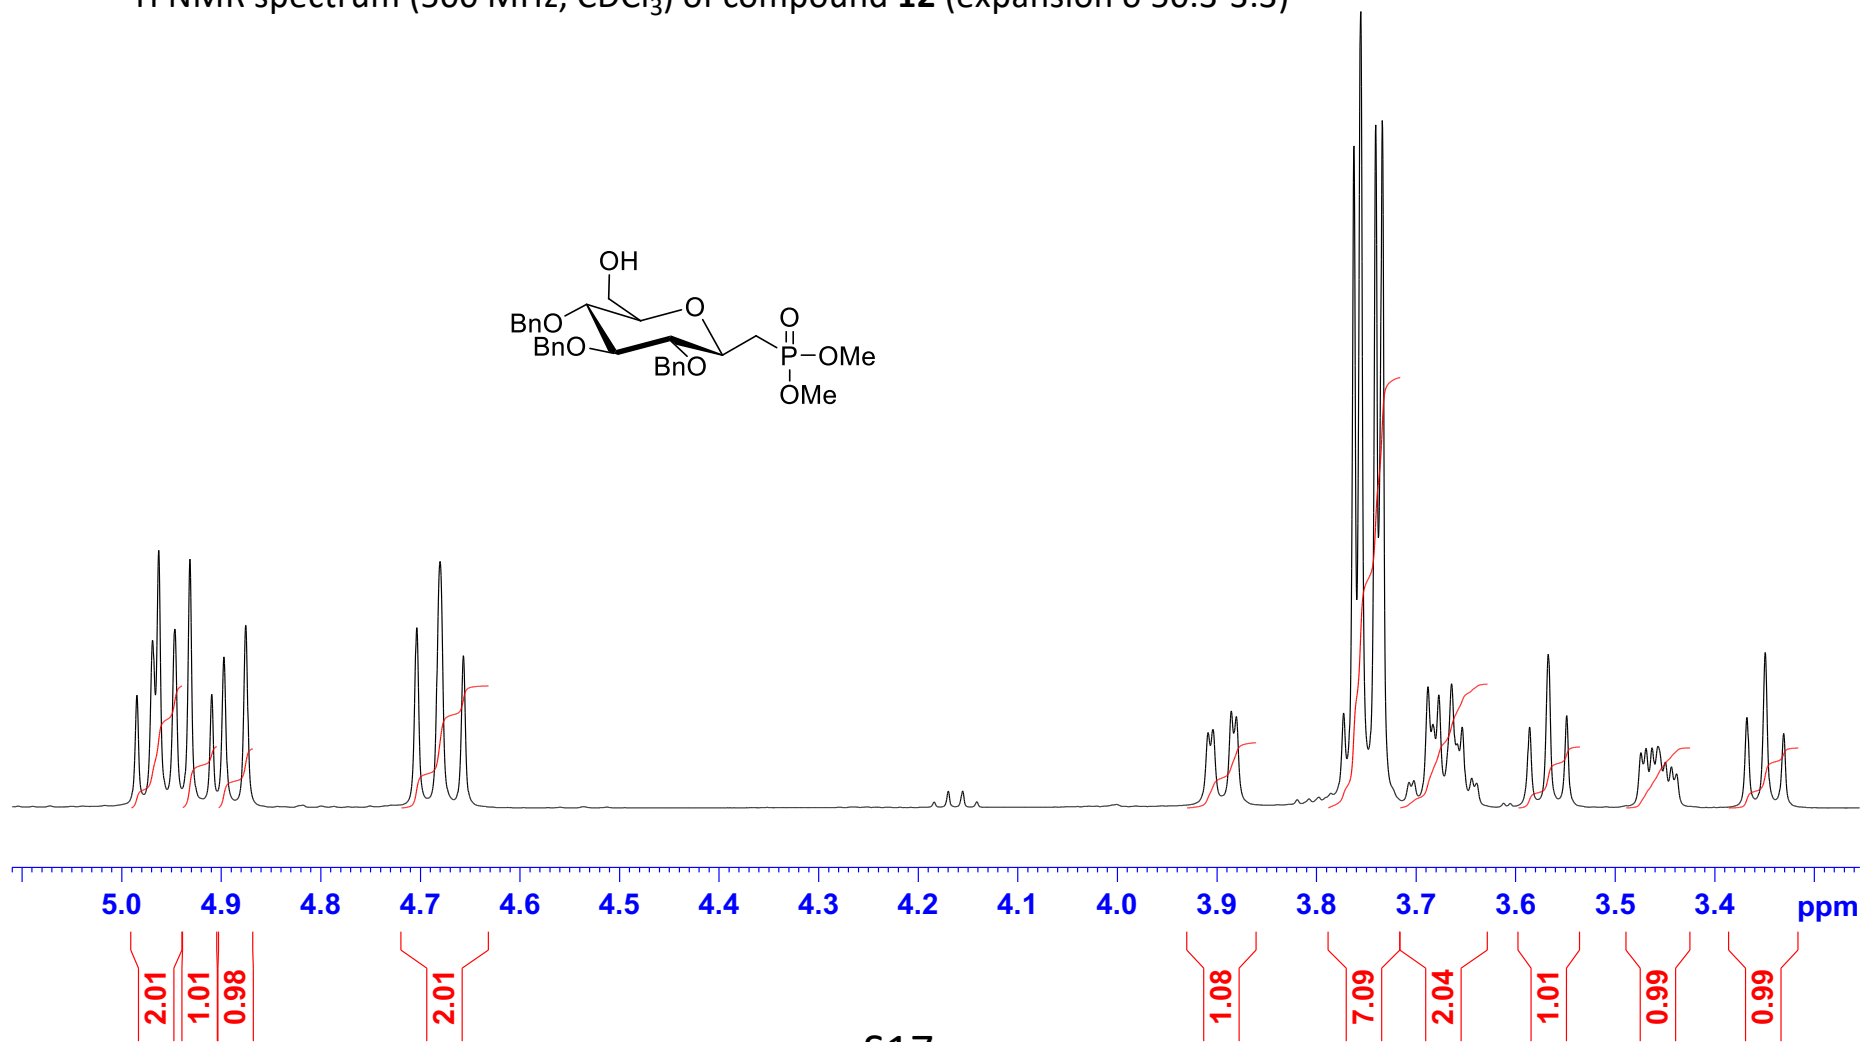

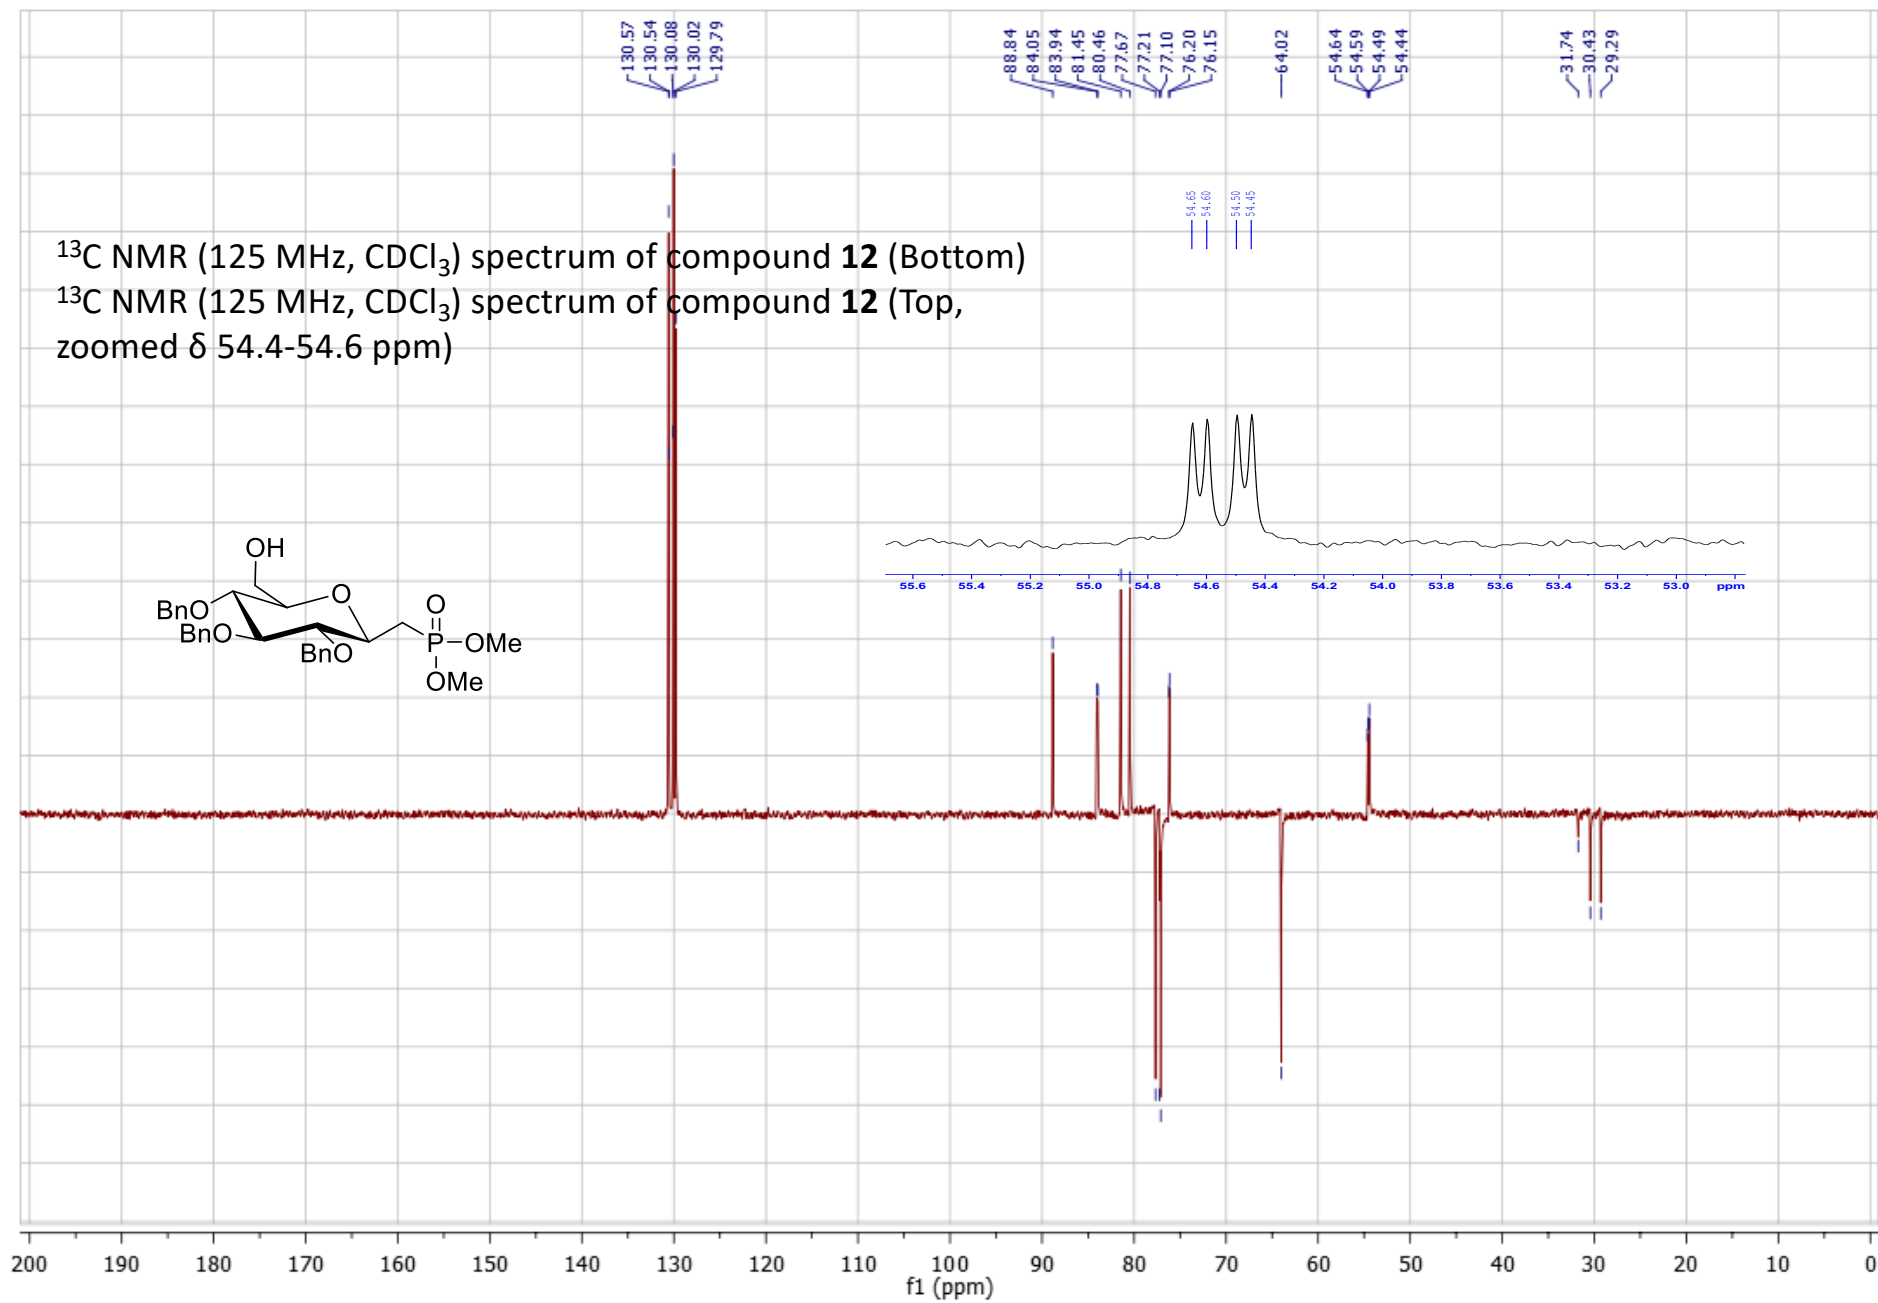

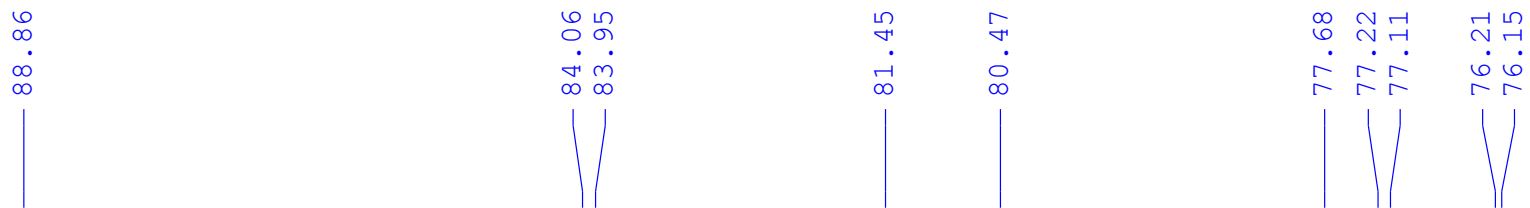

<sup>13</sup>C NMR (125 MHz, CDCl<sub>3</sub>) spectrum of compound **12** (Bottom)

<sup>13</sup>C NMR (125 MHz, CDCl<sub>3</sub>) spectrum of compound **12** (Top, zoomed δ 64.5-64.2 ppm)

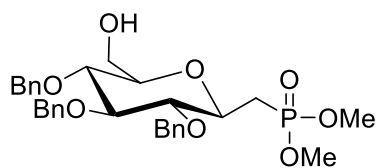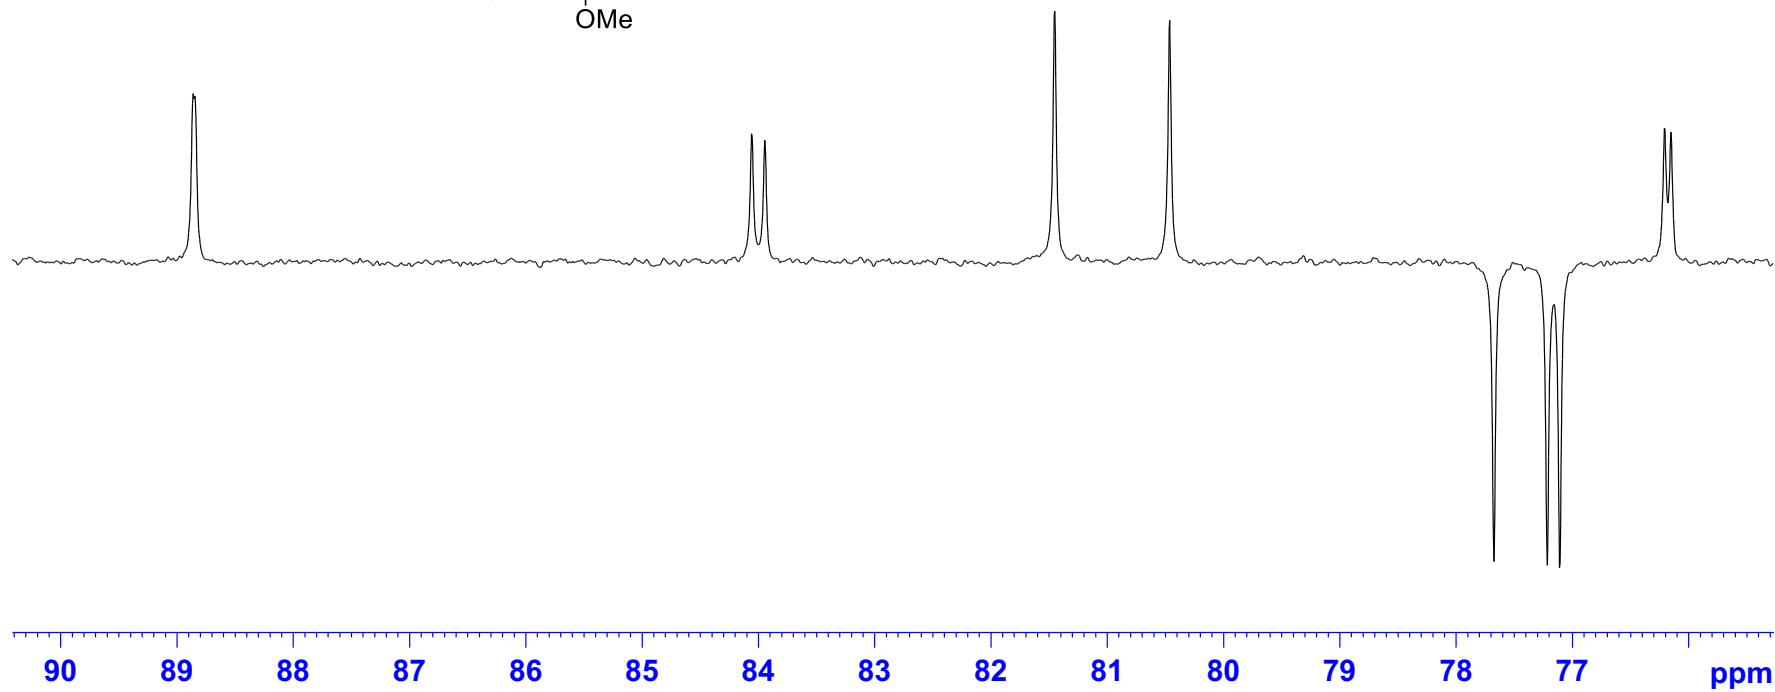

31.47

$^{31}\text{P}\{^1\text{H}\}$  NMR (202.5 MHz,  $\text{CDCl}_3$ ) spectrum of compound **12**

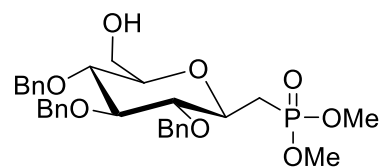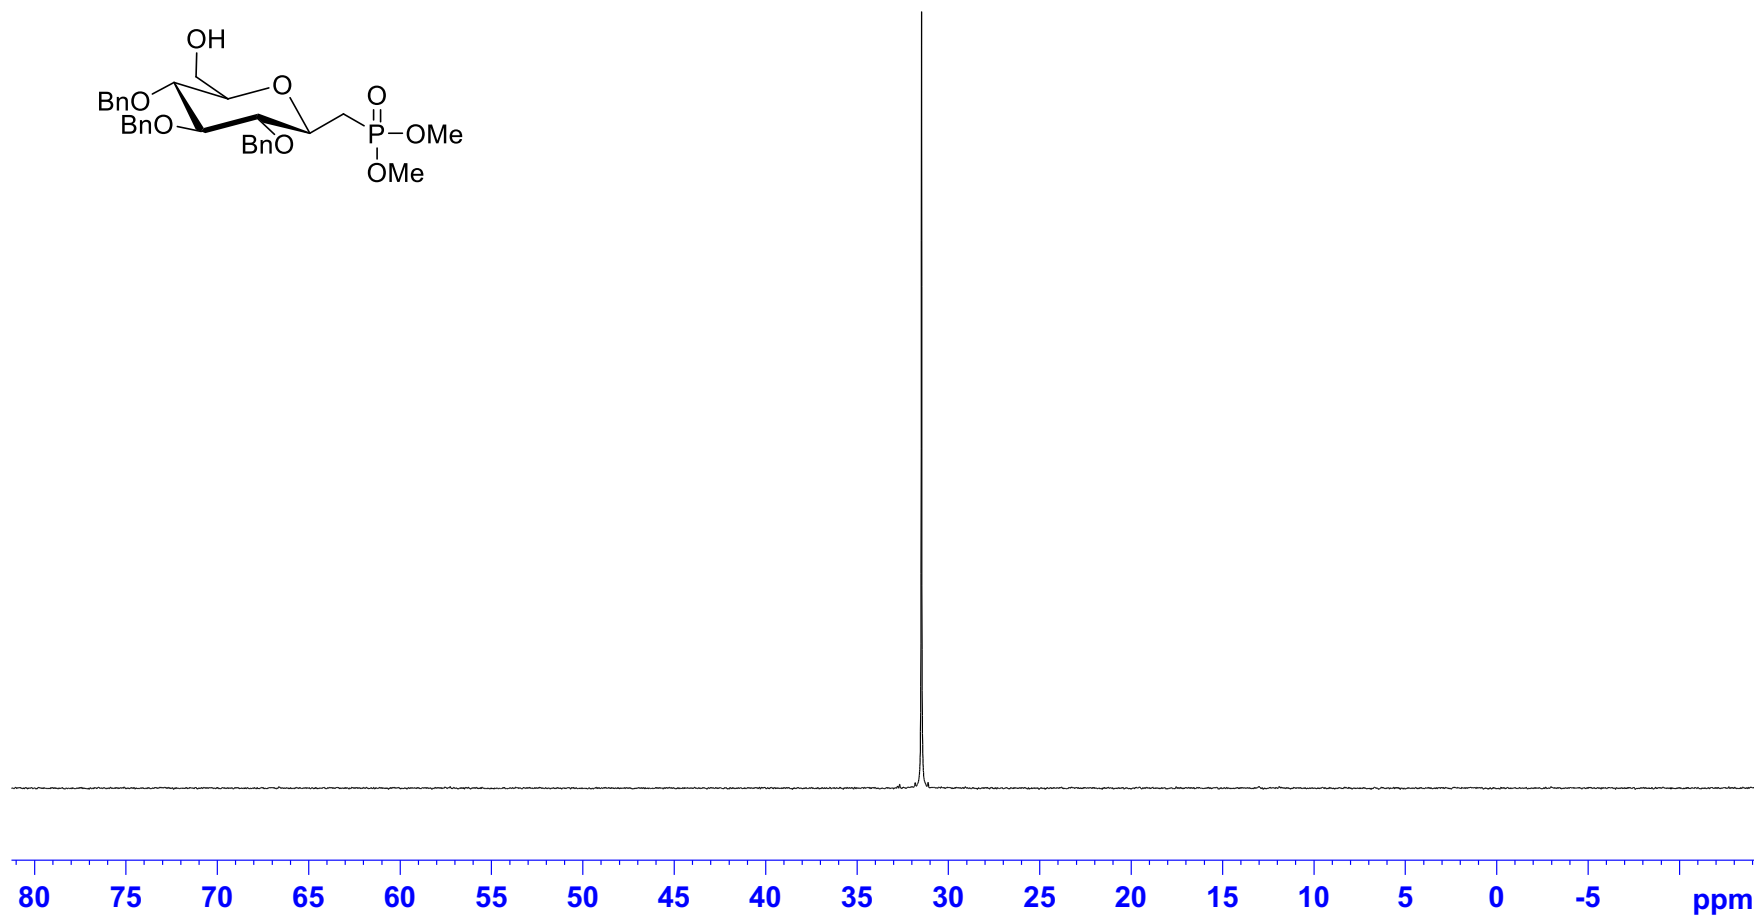

S20

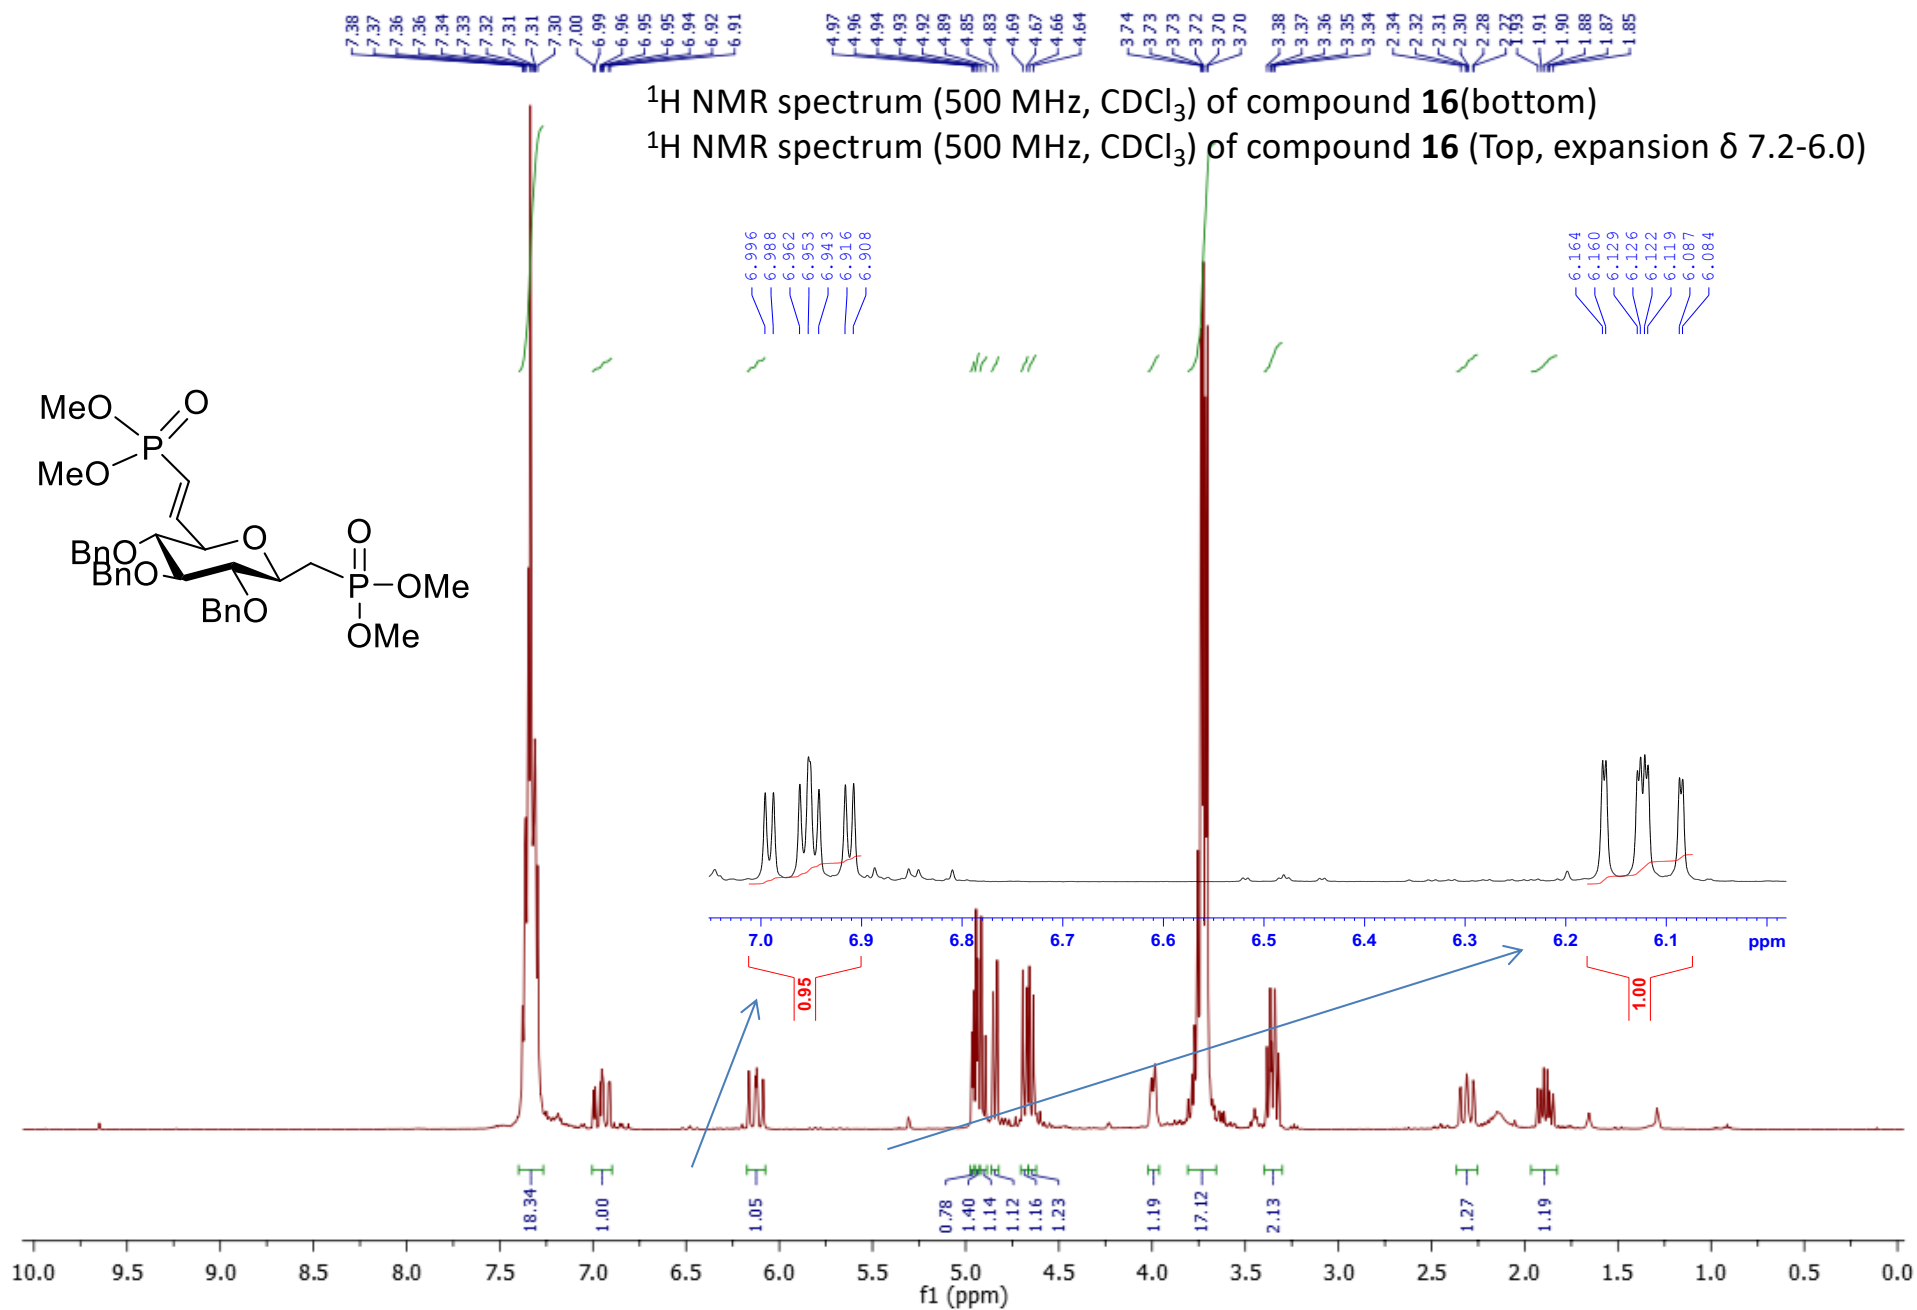

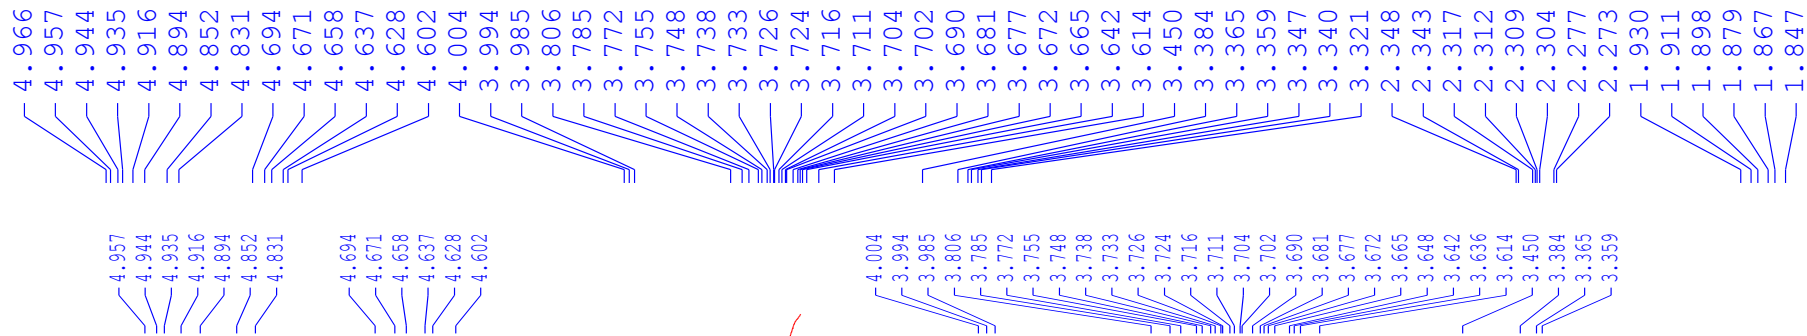

<sup>1</sup>H NMR spectrum (500 MHz, CDCl<sub>3</sub>) of compound **16** (bottom, expansion δ 5.0-1.8 ppm)

<sup>1</sup>H NMR spectrum (500 MHz, CDCl<sub>3</sub>) of compound **16** (Top, expansion δ 6.0-3.3 ppm)

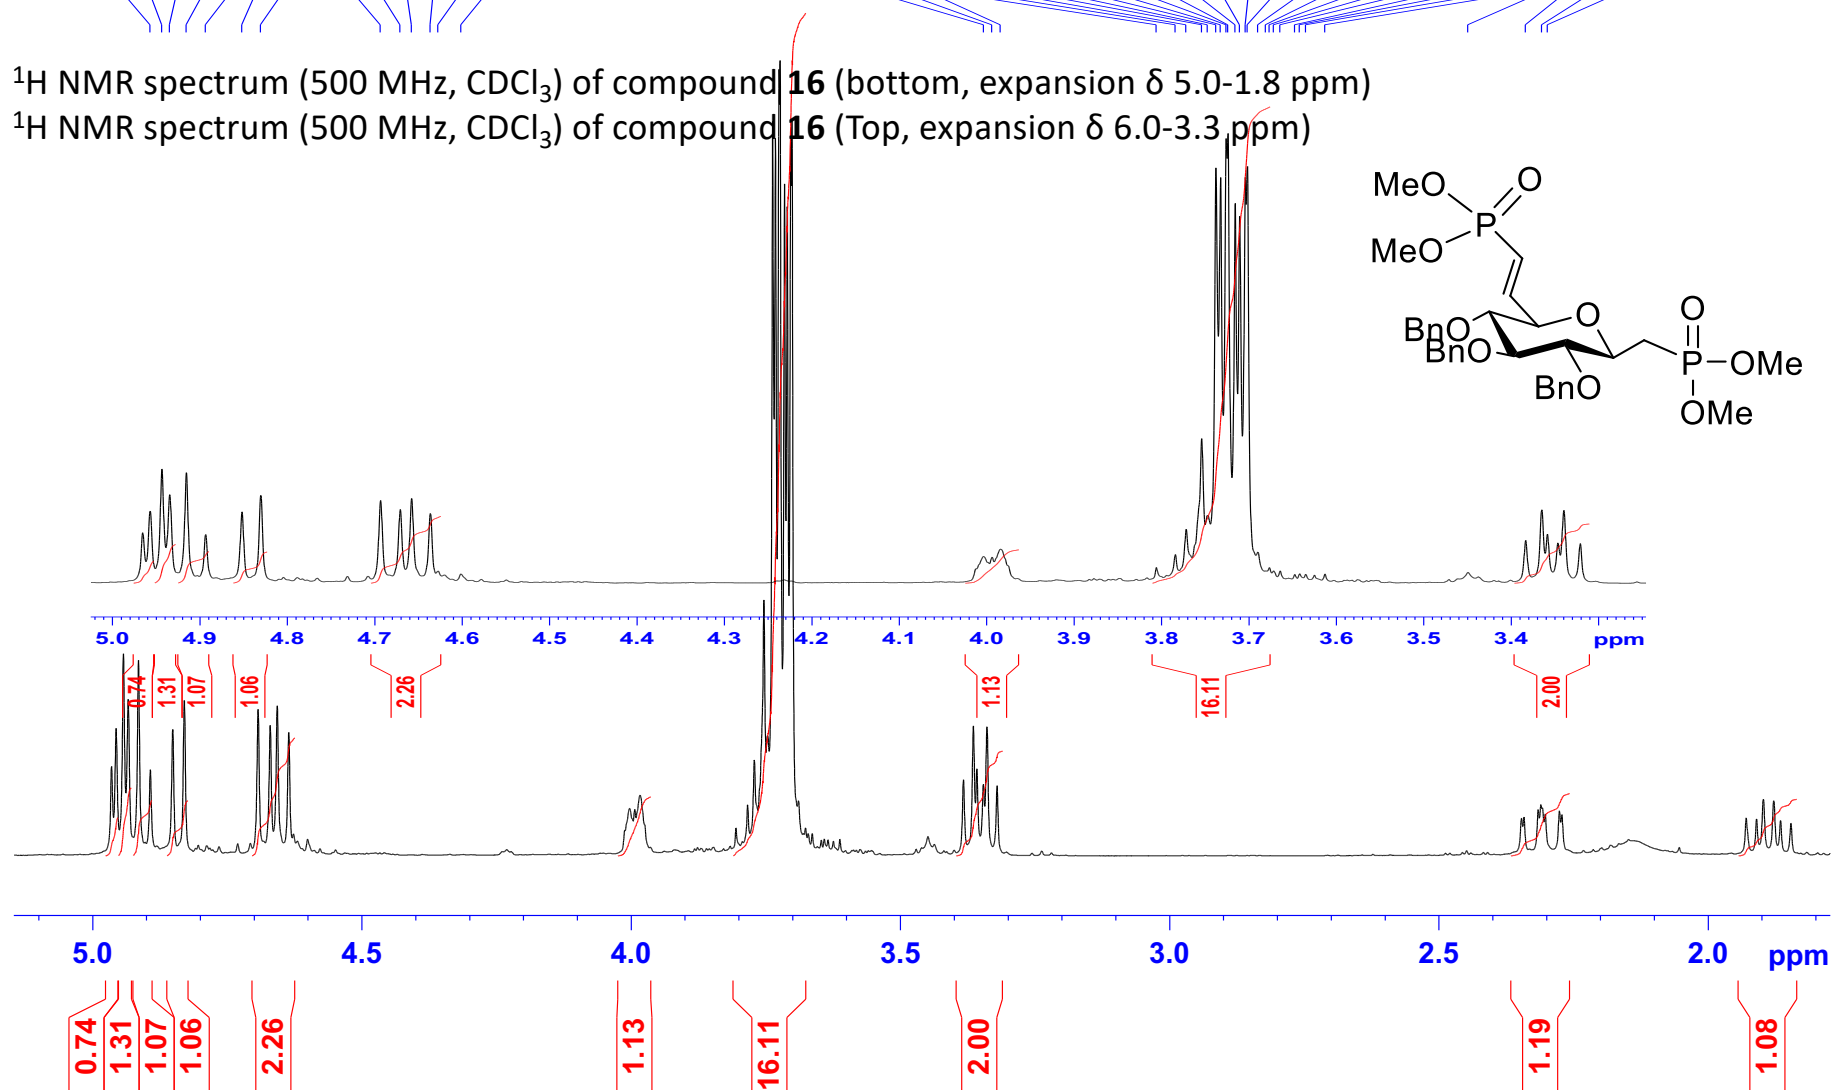

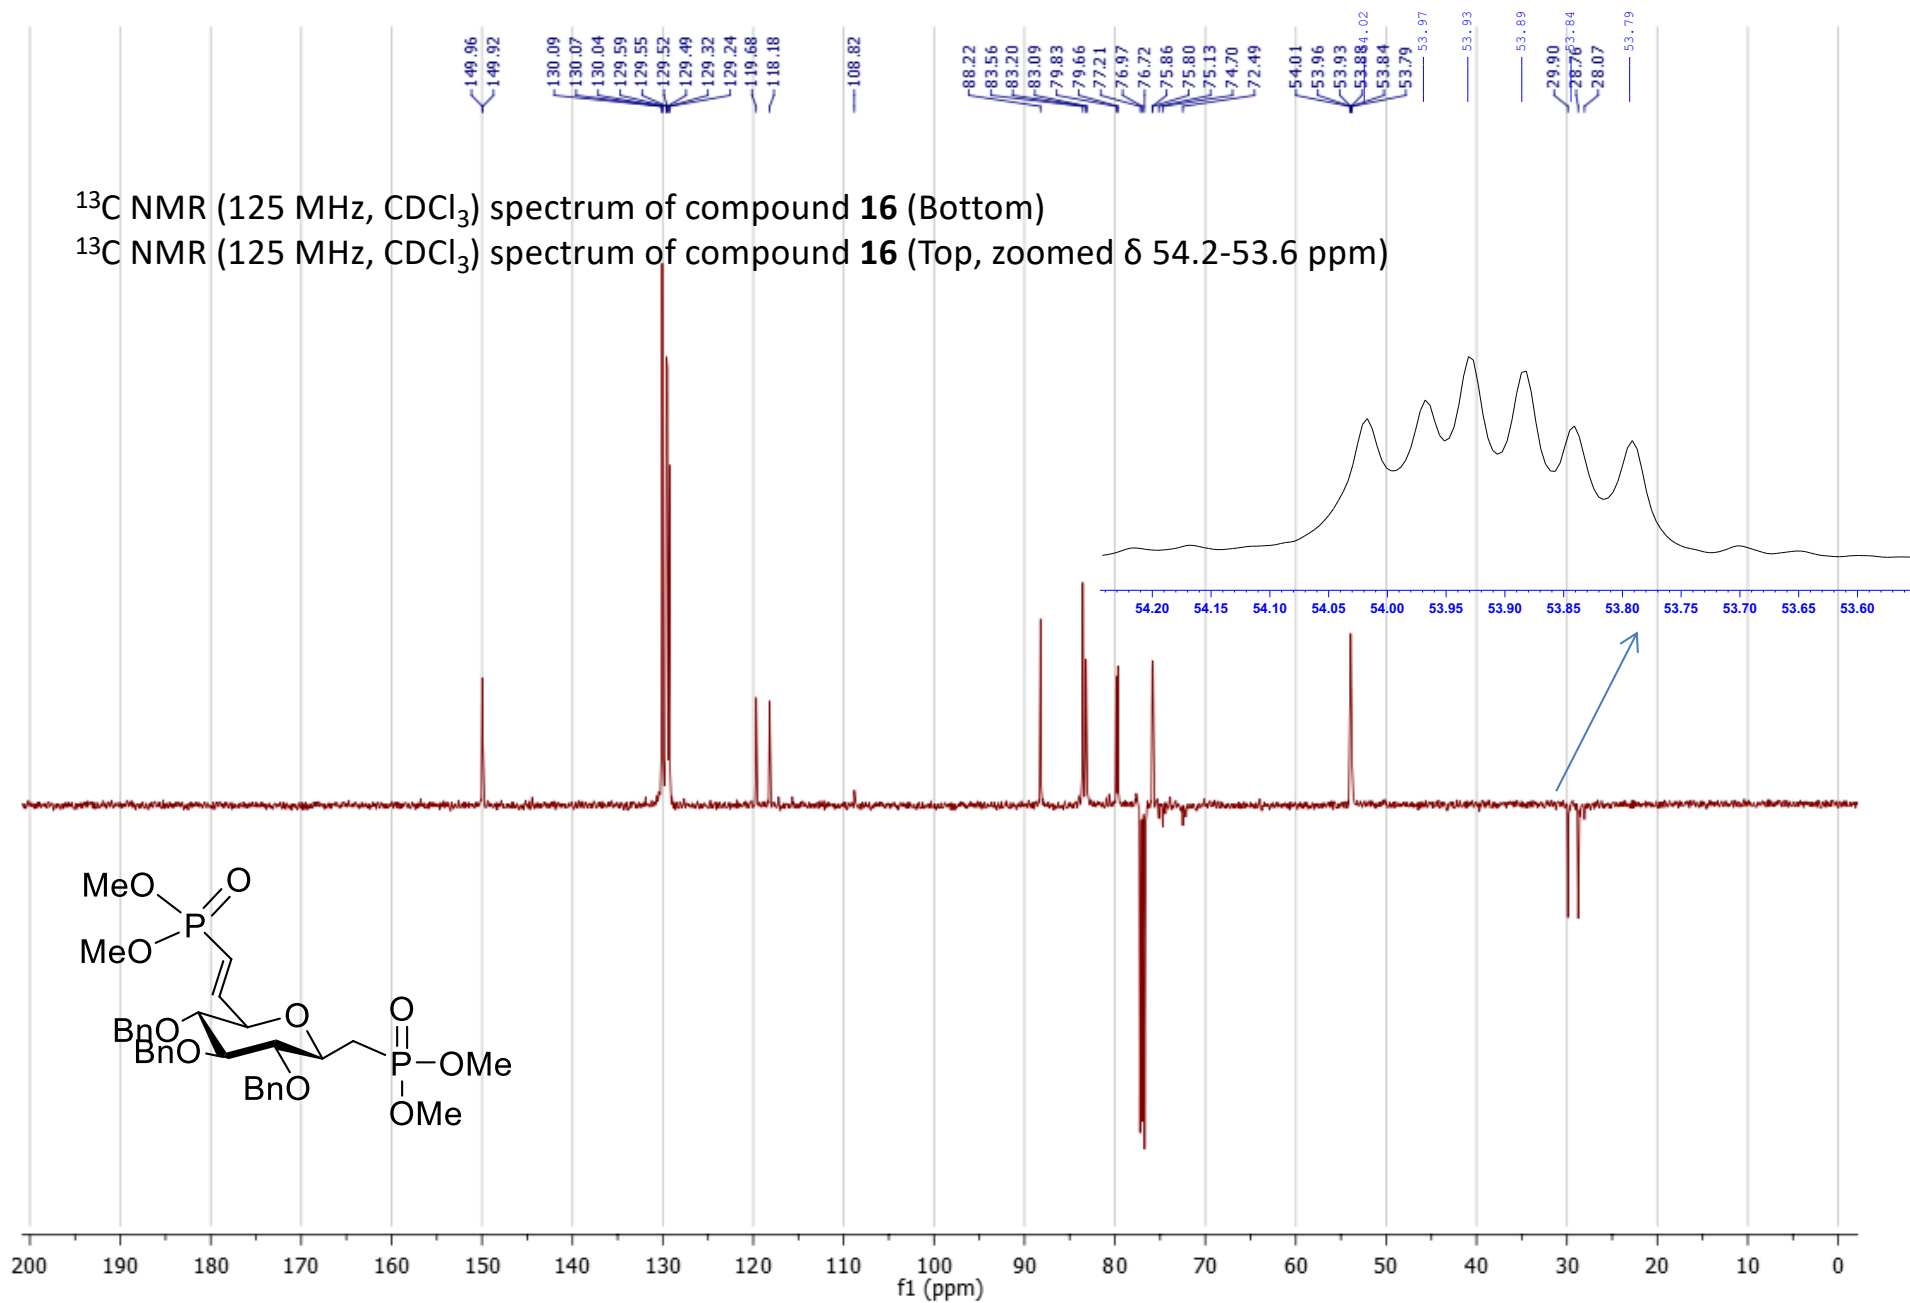

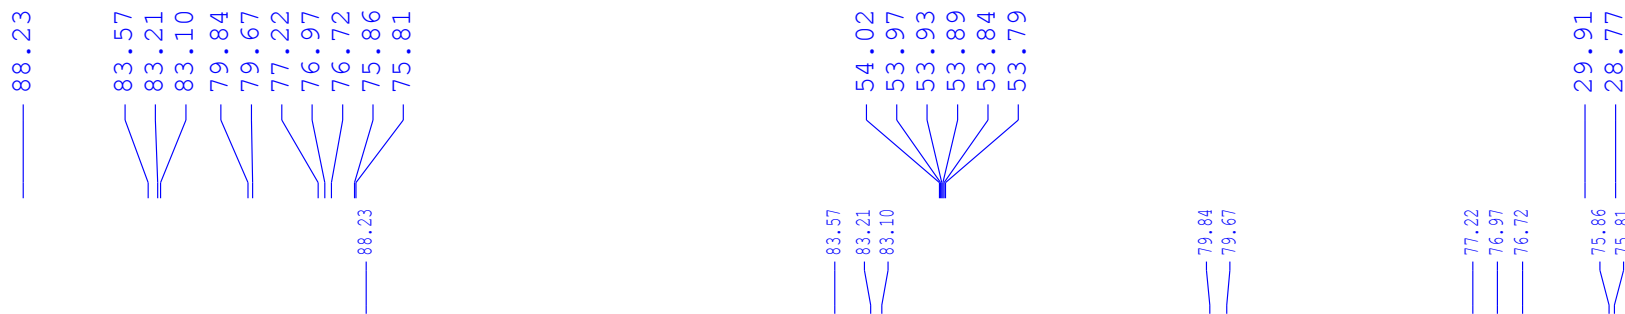

$^{13}\text{C}$  NMR (125 MHz,  $\text{CDCl}_3$ ) spectrum of compound **16** (Bottom, expansion  $\delta$  90.0-28.0 ppm)

$^{13}\text{C}$  NMR (125 MHz,  $\text{CDCl}_3$ ) spectrum of compound **16** (Top, zoomed  $\delta$  89.0-75.0 ppm)

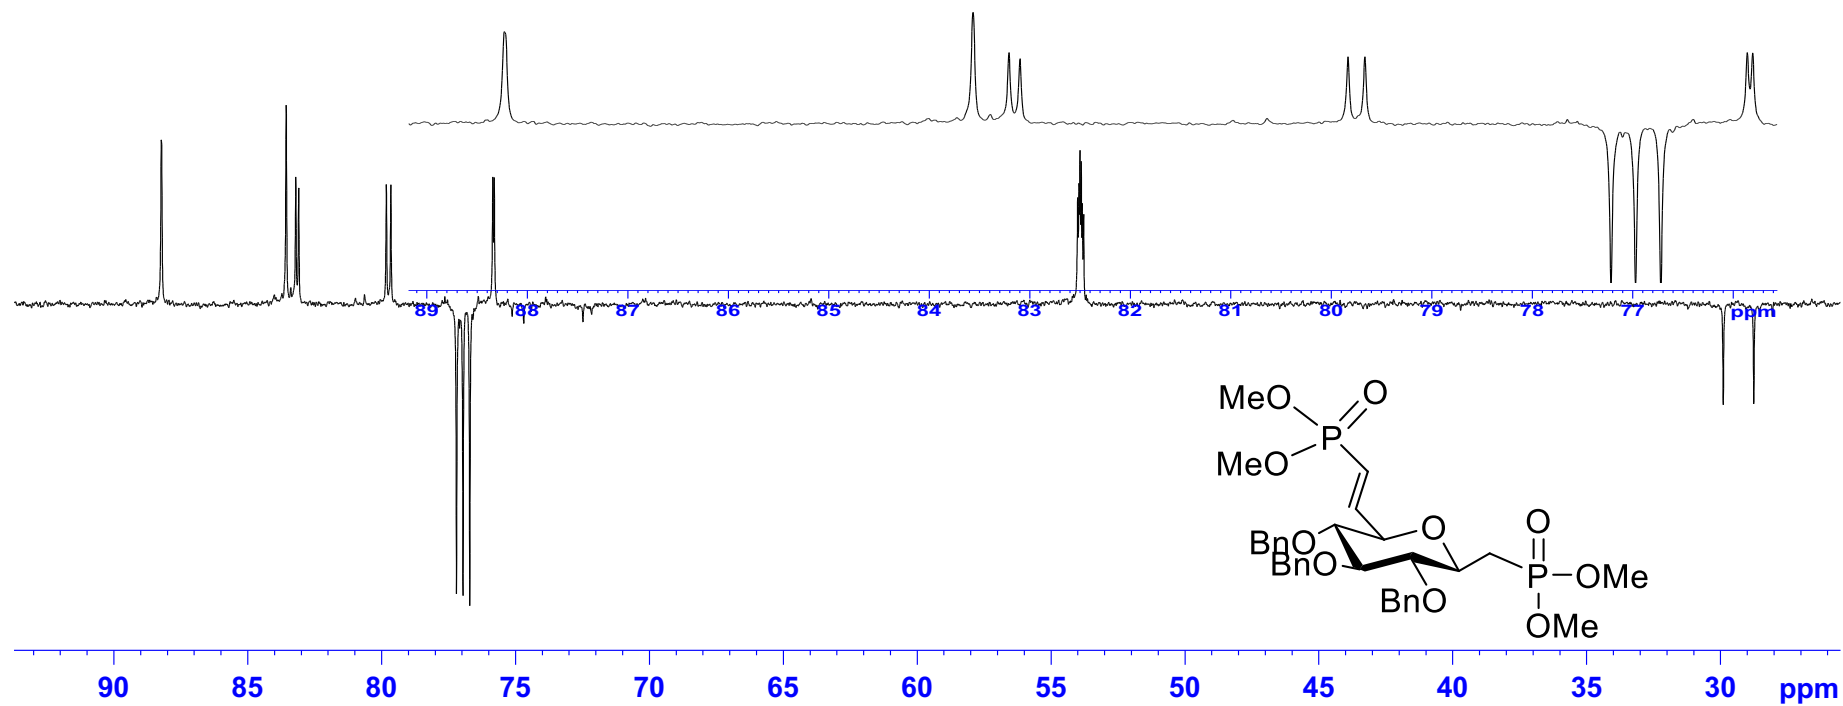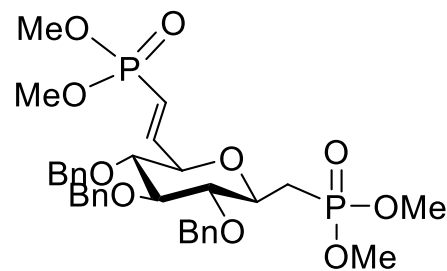



30.99

20.55

$^{31}\text{P}\{^1\text{H}\}$  NMR (202.5 MHz,  $\text{CDCl}_3$ ) spectrum of compound **16**

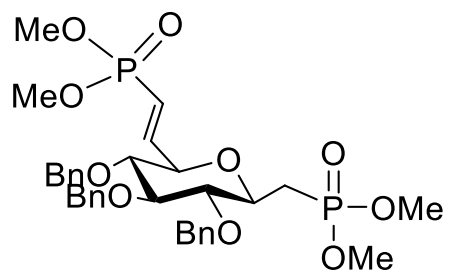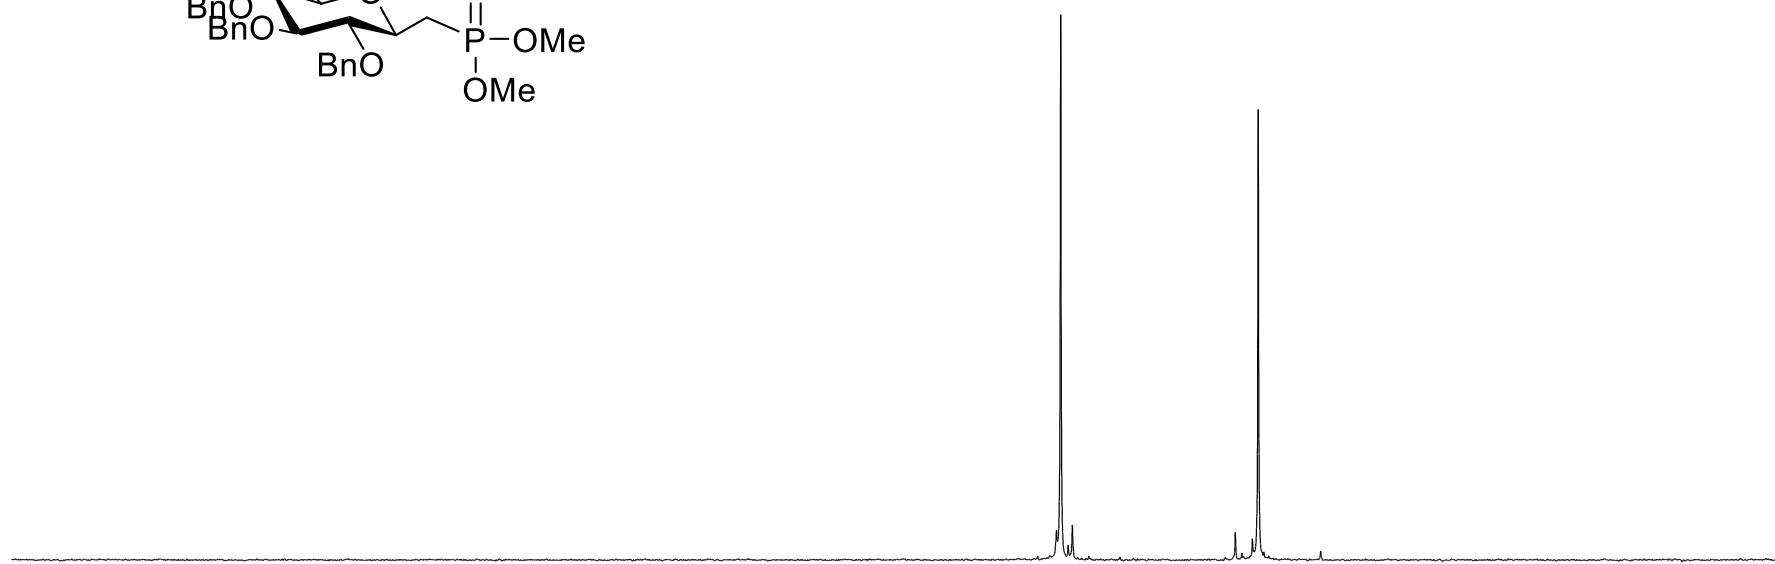

85 80 75 70 65 60 55 50 45 40 35 30 25 20 15 10 5 0 ppm

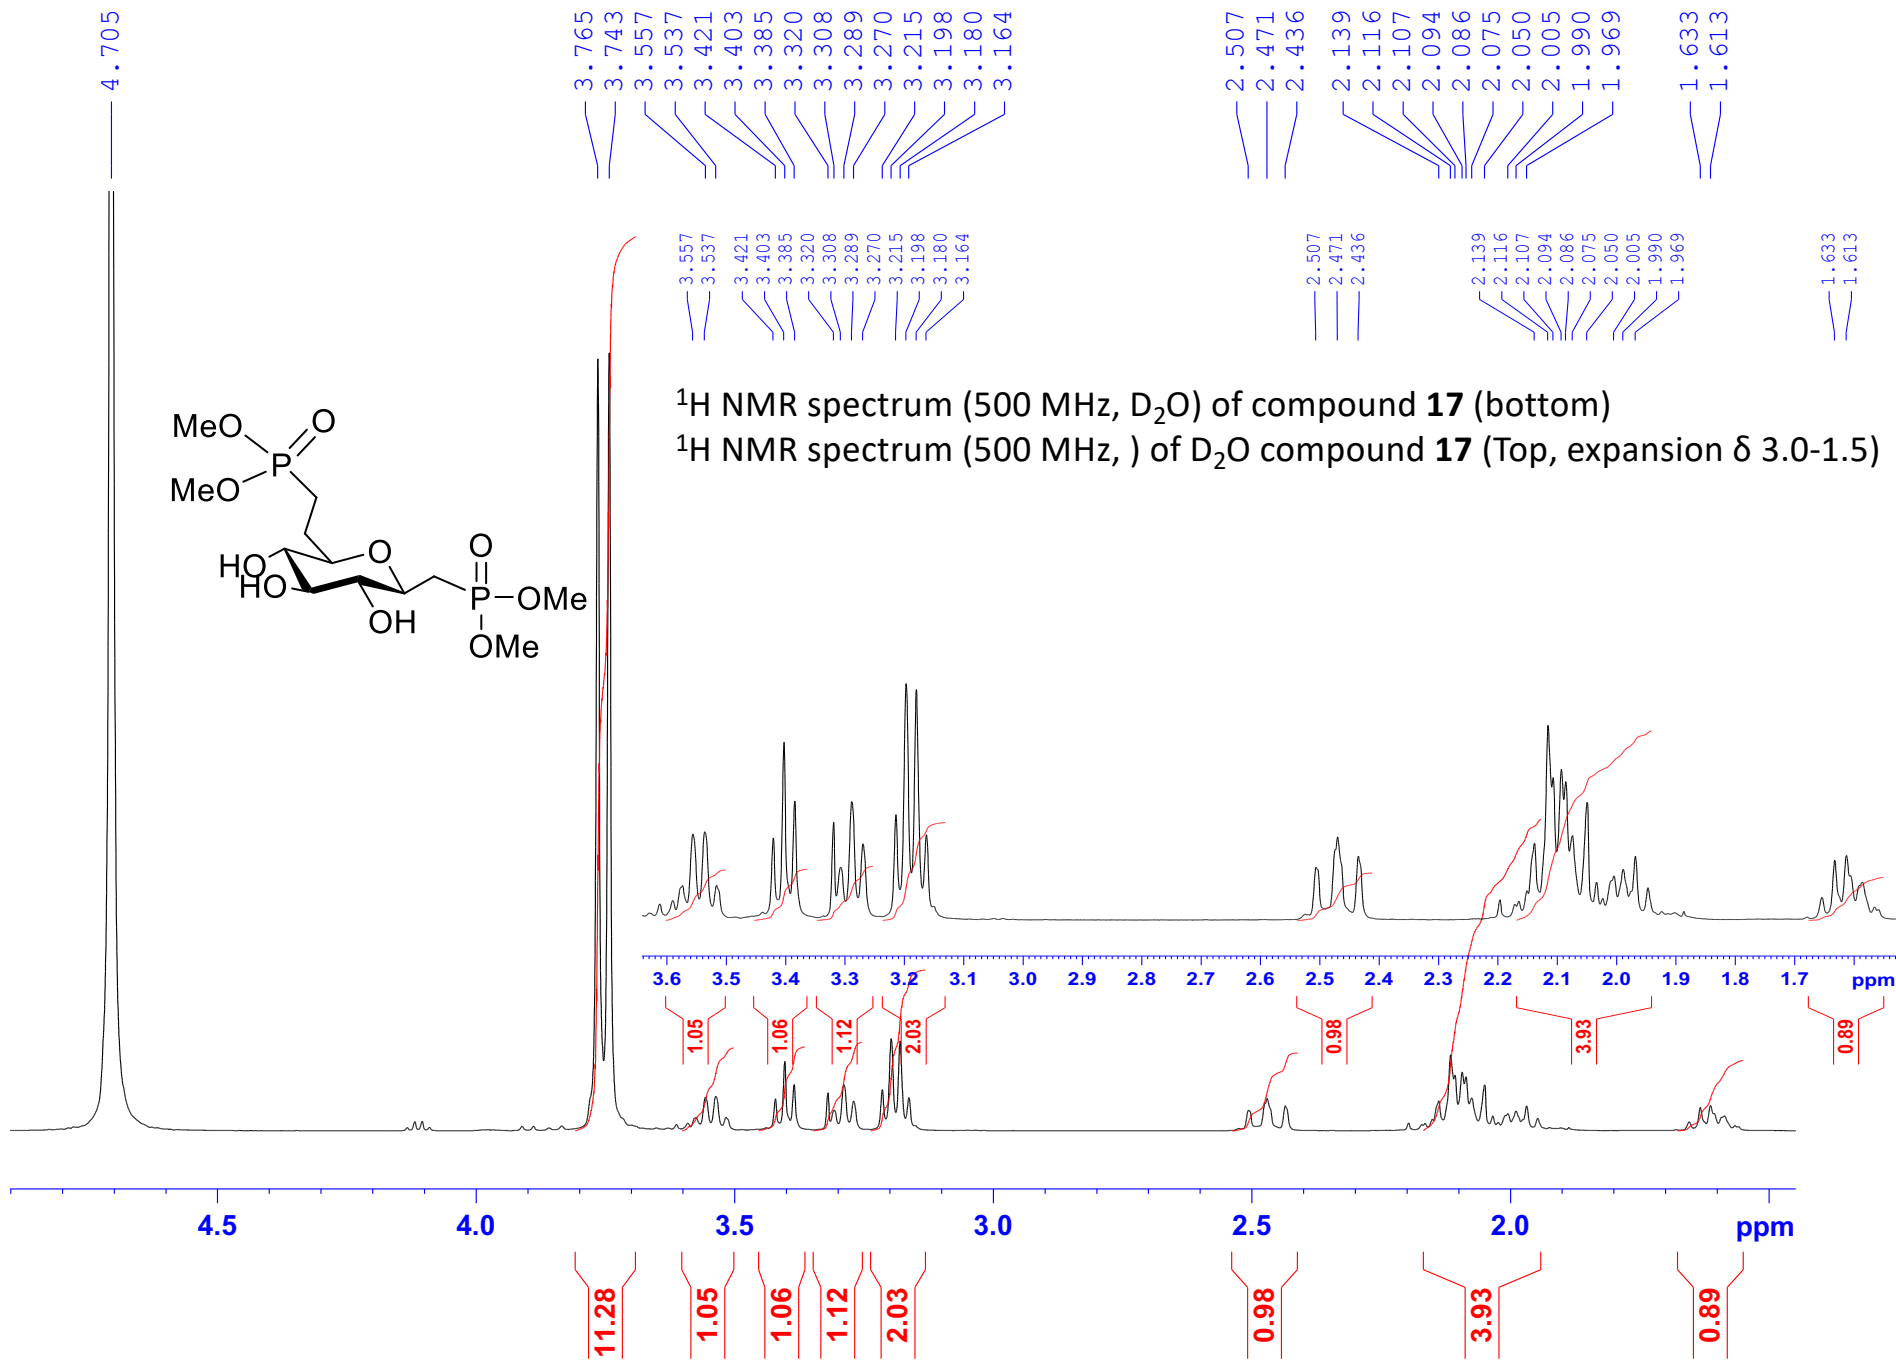

78.78  
78.65

76.95

78.78  
78.65  
76.95  
74.45  
74.39  
74.19  
74.06  
73.38

53.12  
53.09  
53.04

74.45  
74.39

74.19  
6.67  
25.55  
23.89  
23.86  
19.26  
18.15

73.38

$^{13}\text{C}$  NMR (125 MHz,  $\text{D}_2\text{O}$ ) spectrum of compound **17** (Bottom)

$^{13}\text{C}$  NMR (125 MHz,  $\text{D}_2\text{O}$ ) spectrum of compound **17** (Top, expansion  $\delta$  79.0-73.0 ppm)

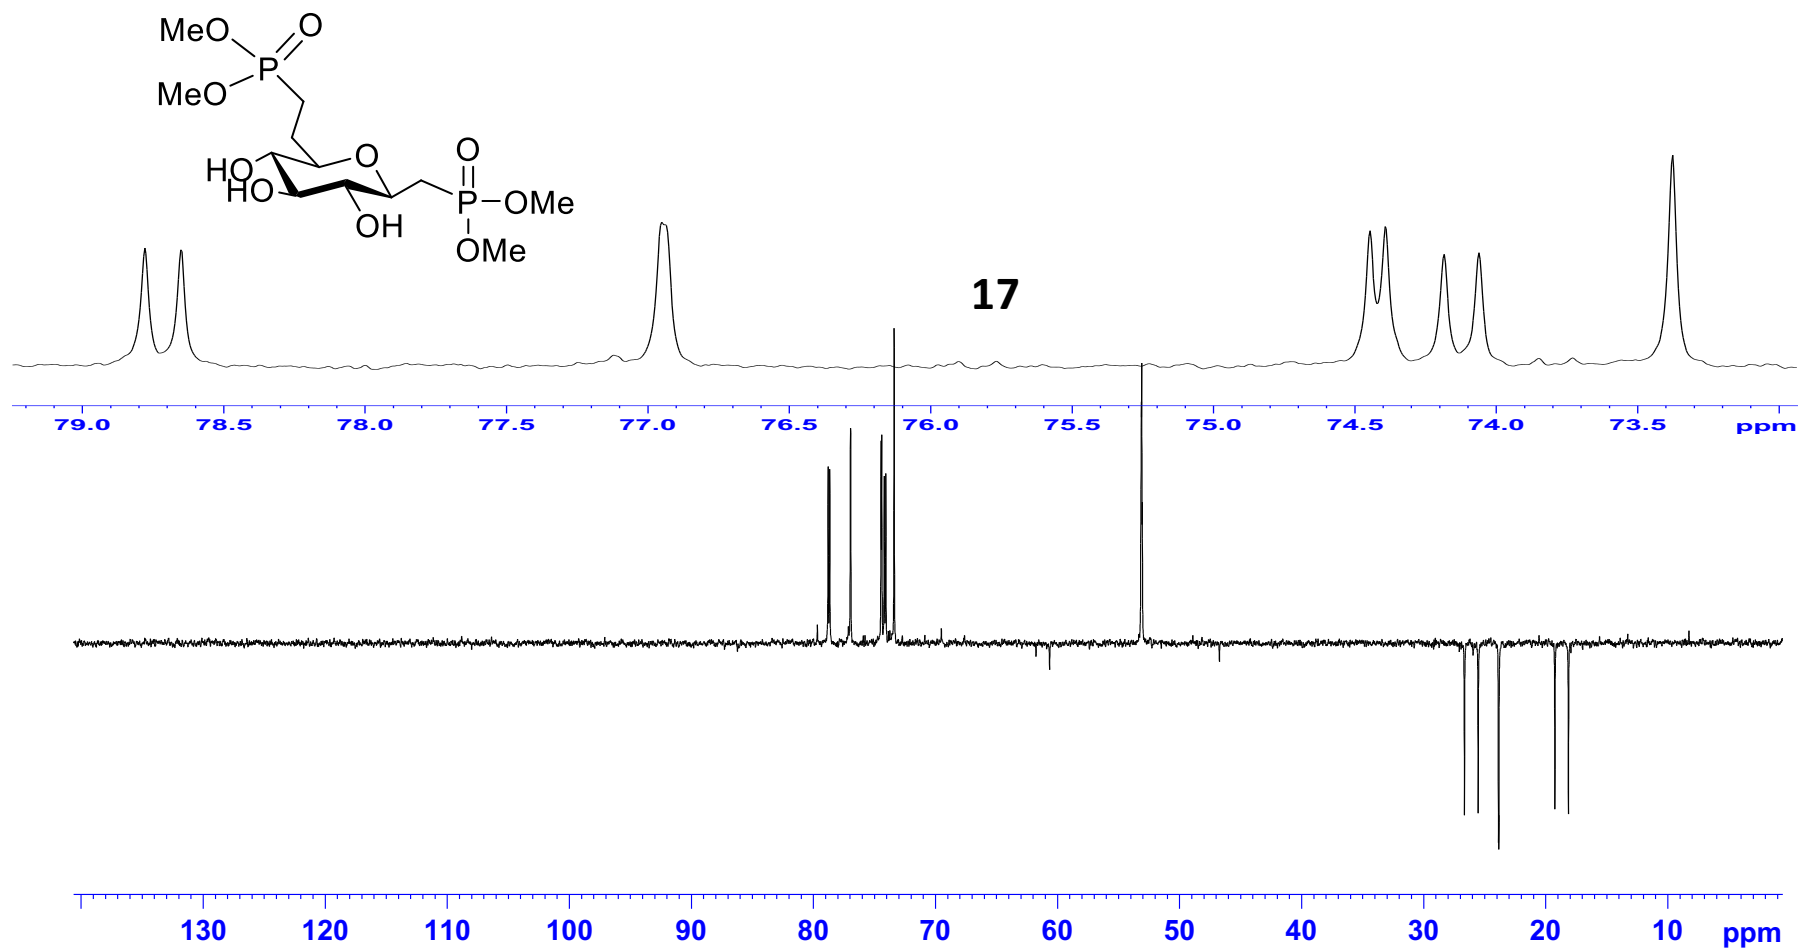

38.64  
34.88

$^{31}\text{P}\{^1\text{H}\}$  NMR (202.5 MHz,  $\text{D}_2\text{O}$ ) spectrum of compound **17**

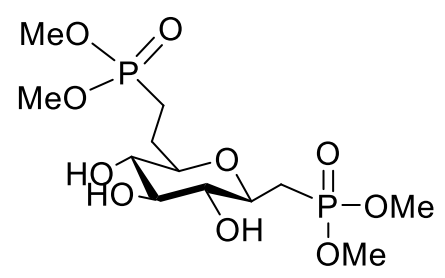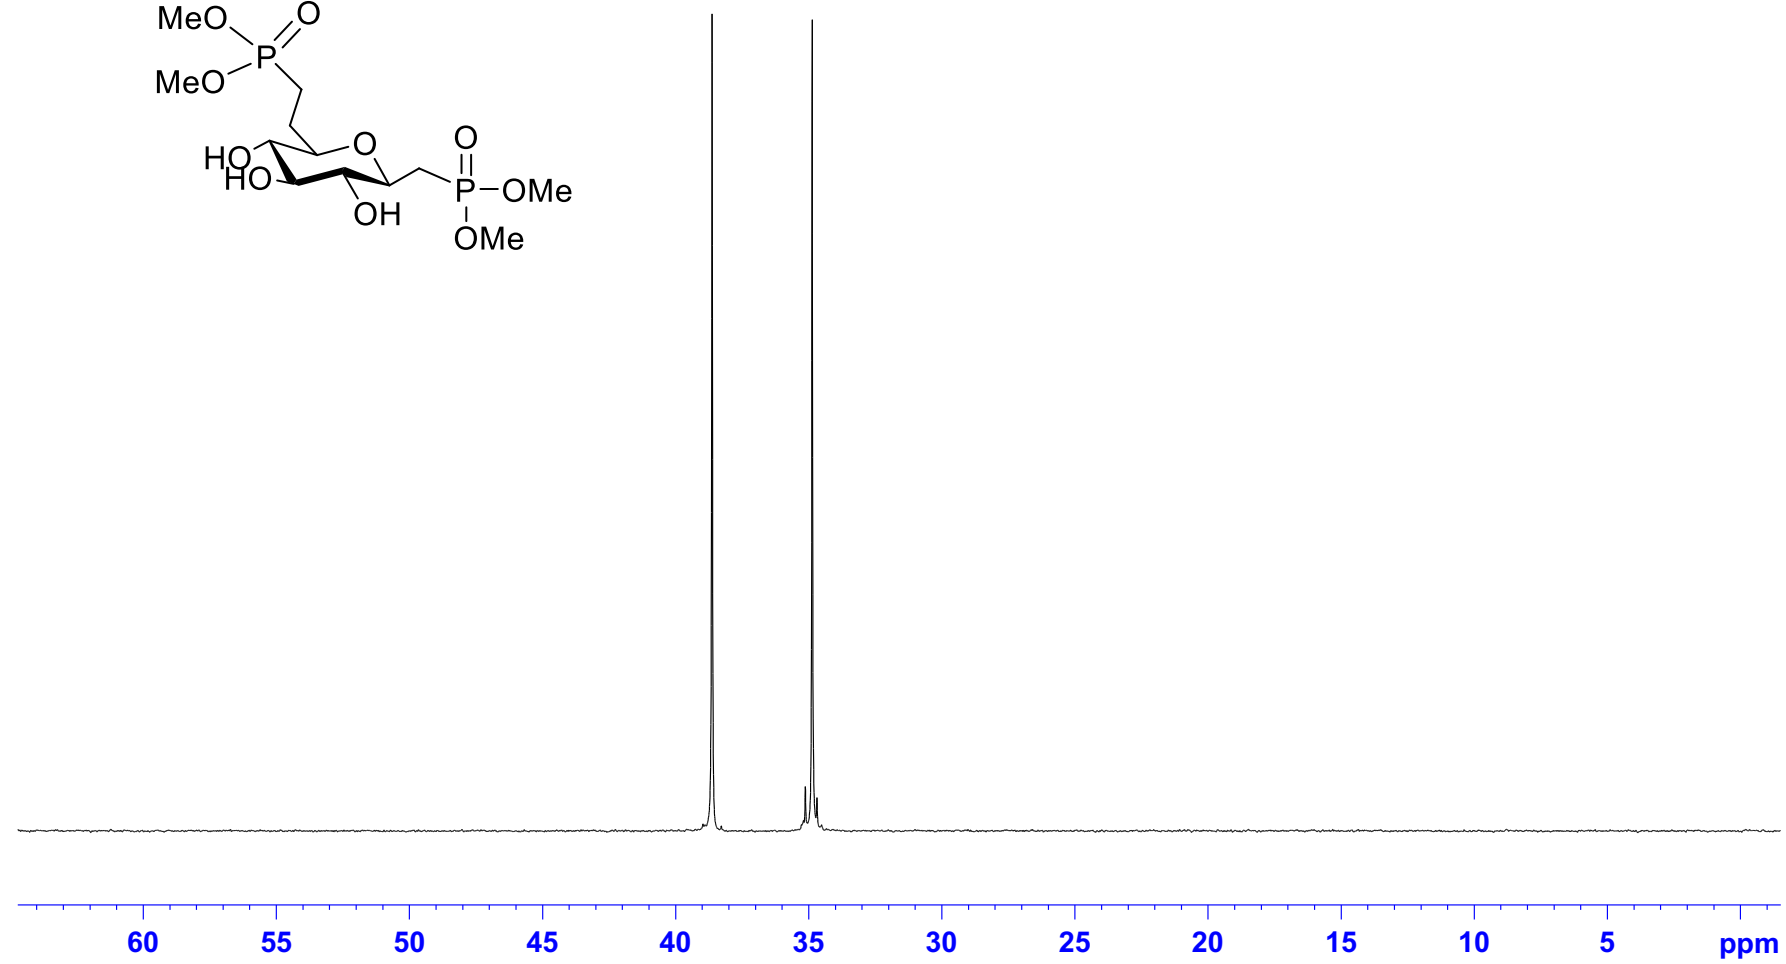

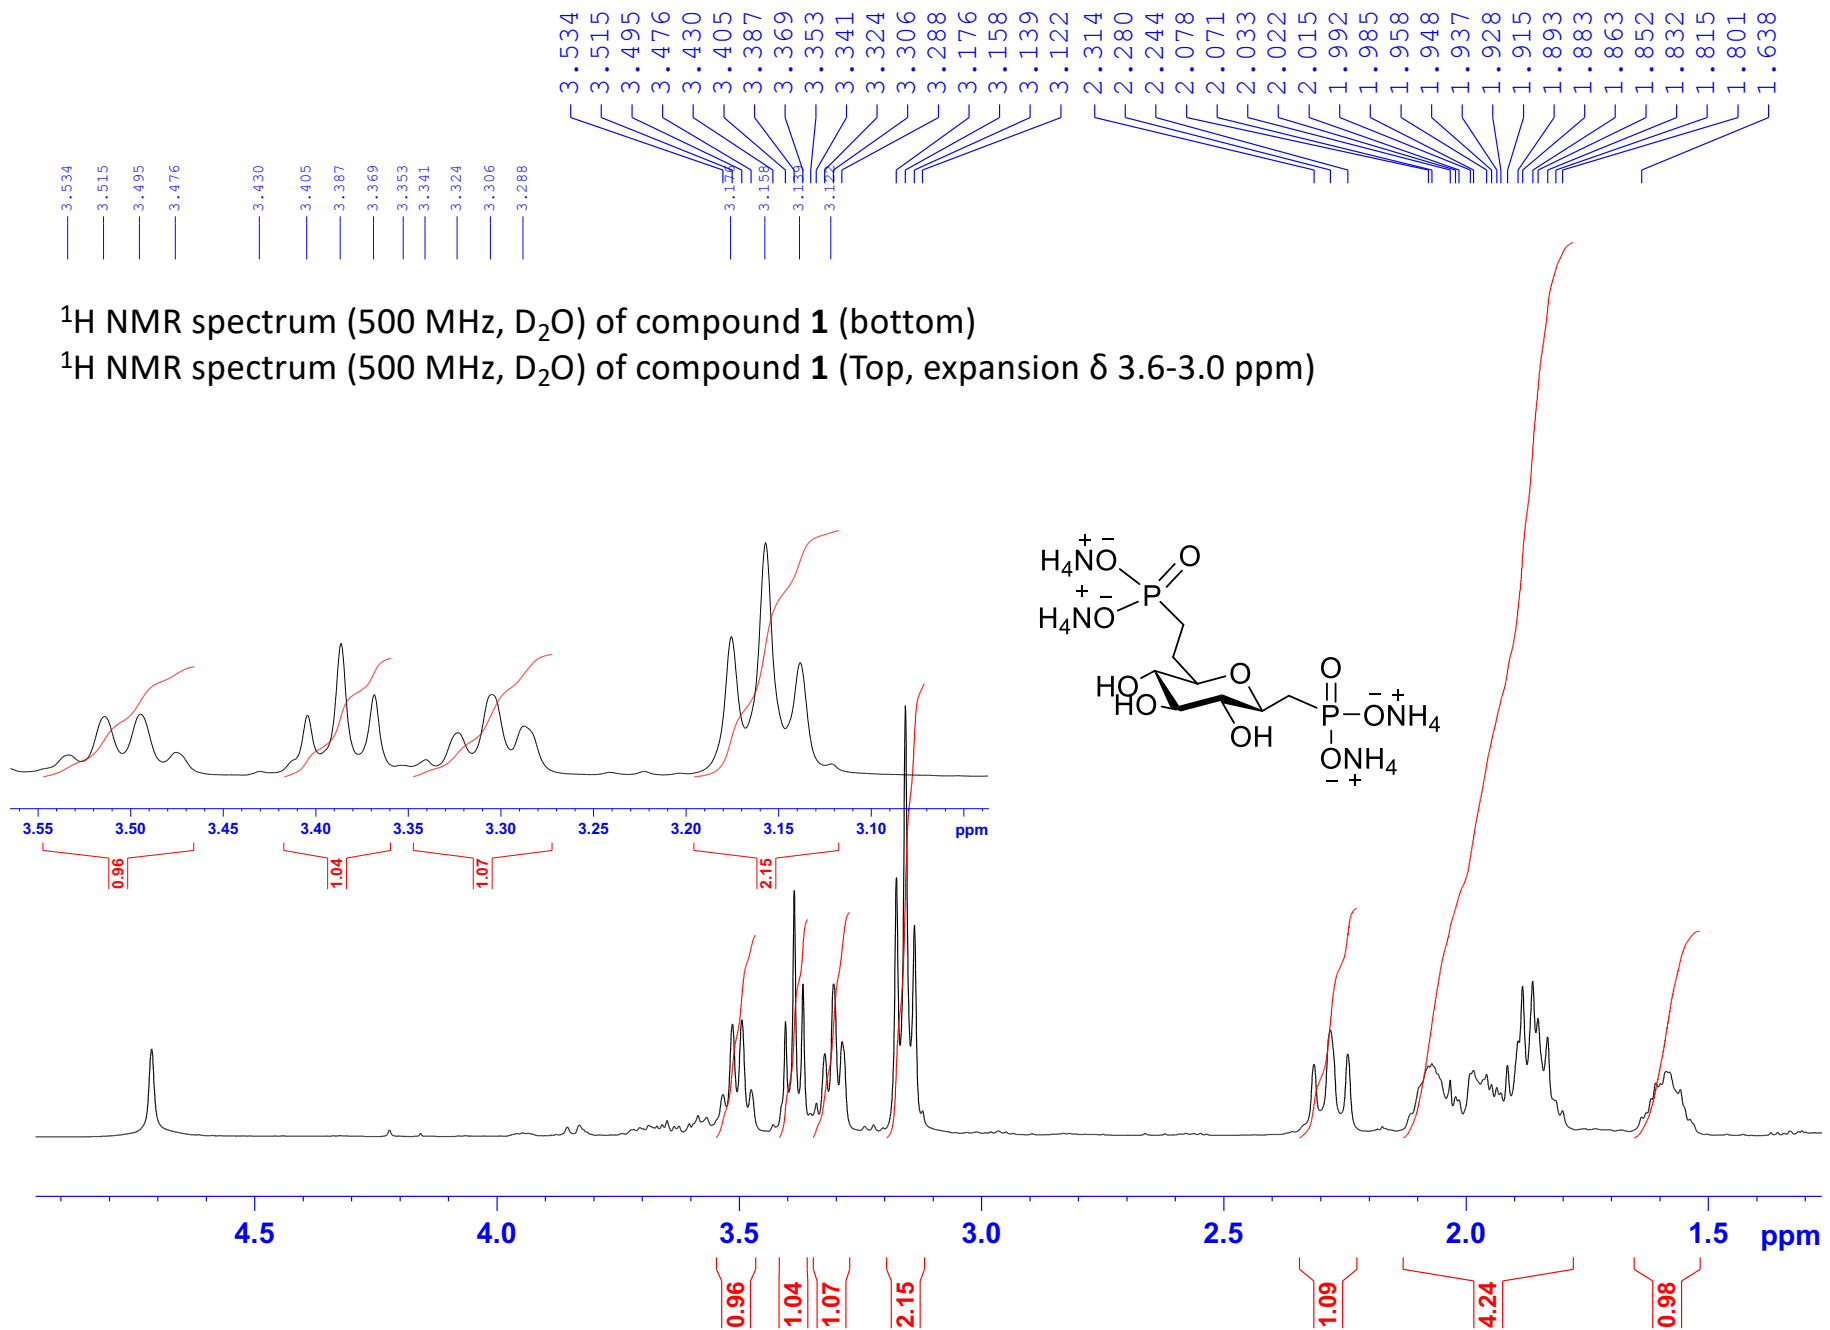

$^{13}\text{C}$  NMR (125 MHz,  $\text{D}_2\text{O}$ ) spectrum of compound **1**

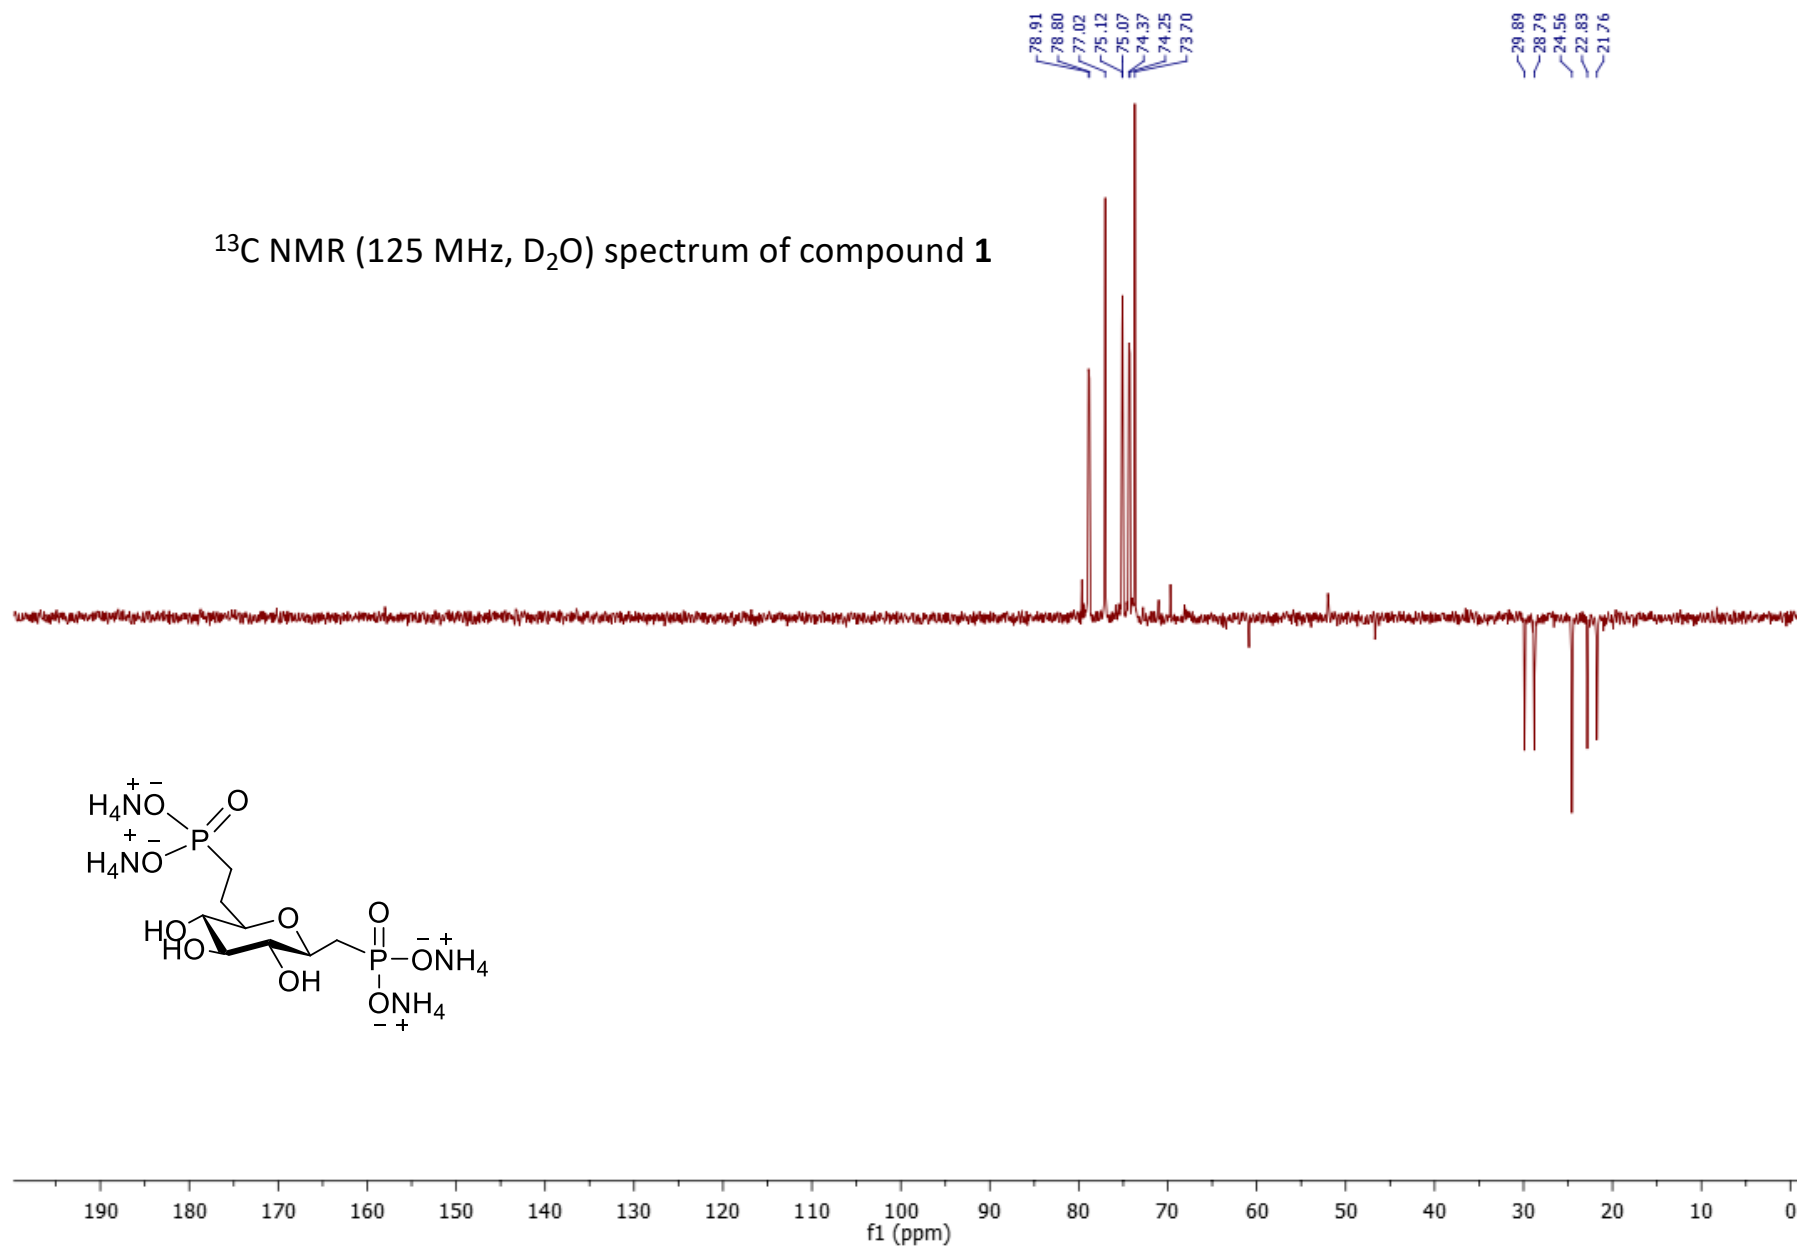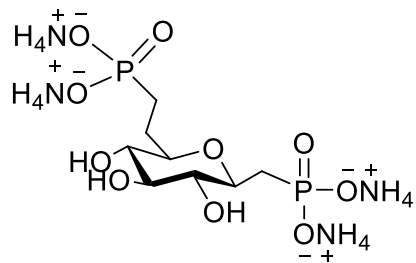

78.92  
78.80

77.03

75.13  
75.08

74.38  
74.26

73.71

$^{13}\text{C}$  NMR (125 MHz,  $\text{D}_2\text{O}$ ) spectrum of compound **1** (expansion  $\delta$  80-73 ppm)

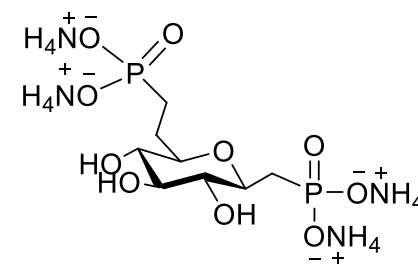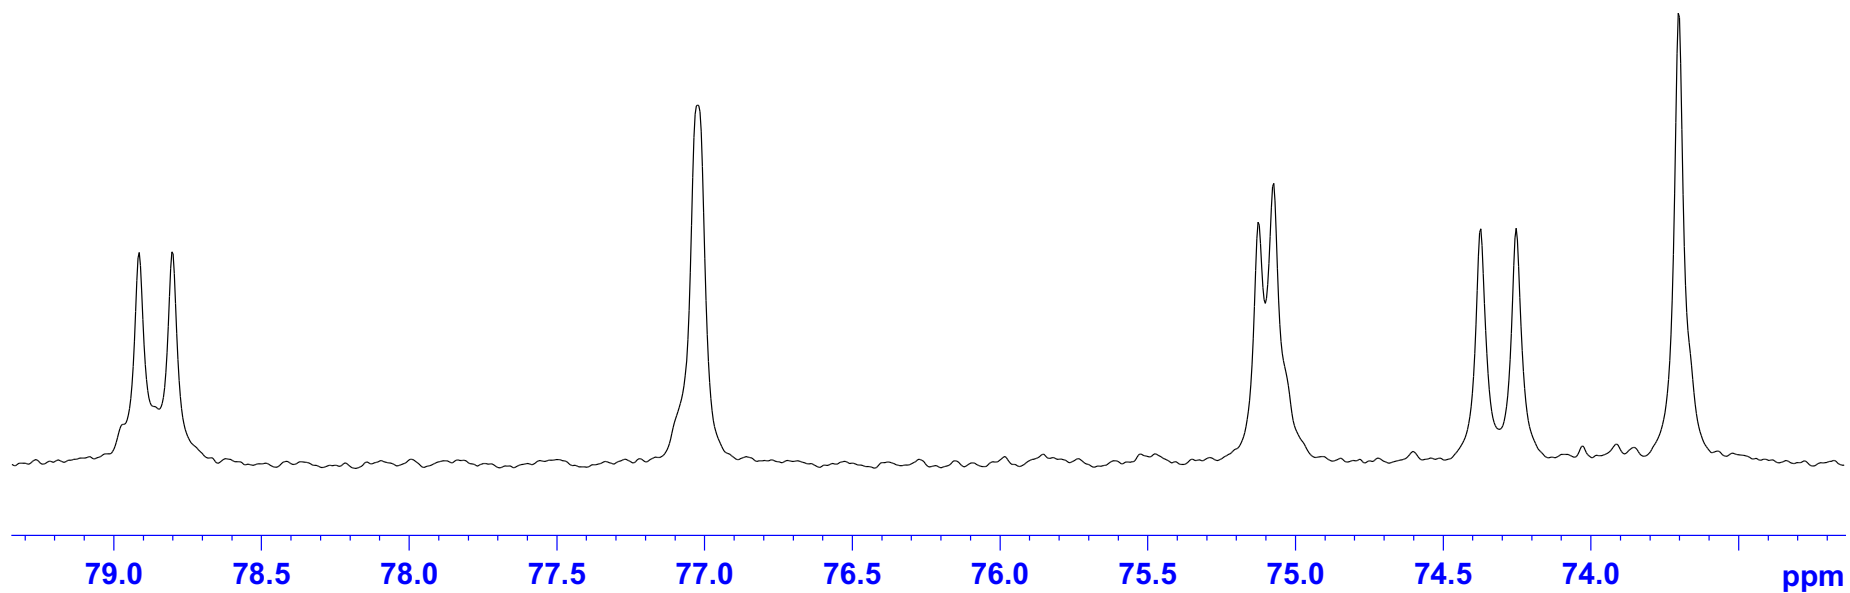

S31

30.88  
26.55

$^{31}\text{P}\{^1\text{H}\}$  NMR (202.5 MHz,  $\text{D}_2\text{O}$ ) spectrum of compound **1**

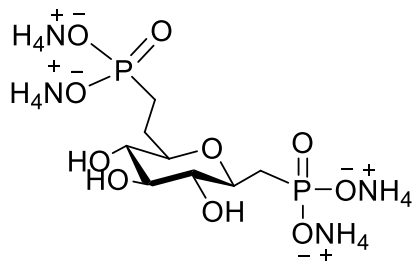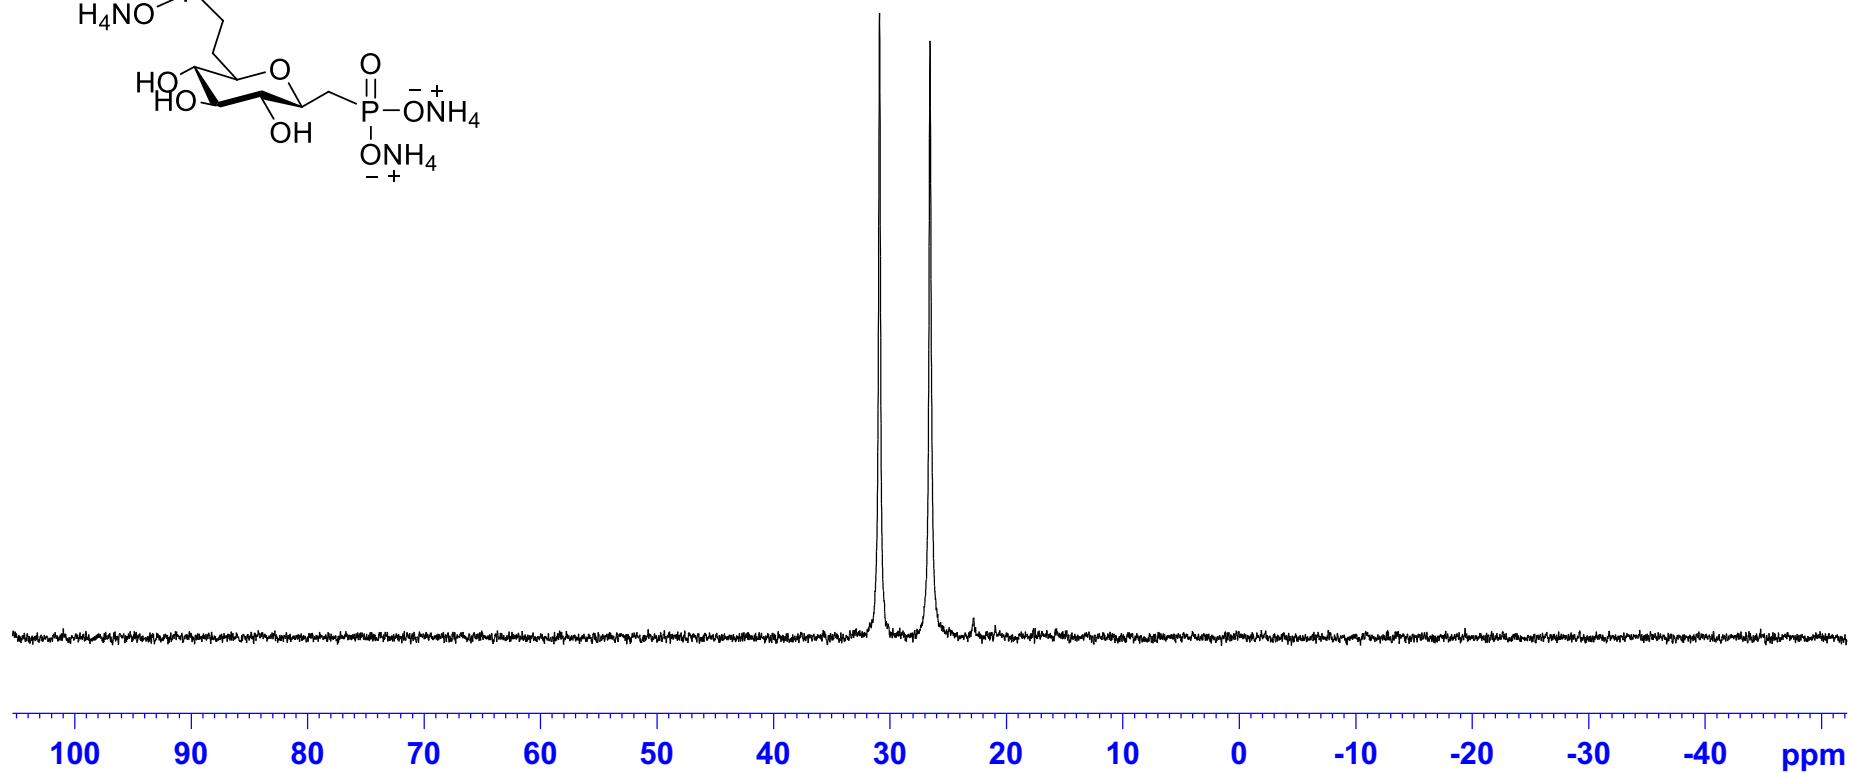

S32
